# Supplementary material for: Design, synthesis, and biologic evaluation of novel chrysin derivatives as cytotoxic agents and caspase-3/7 activators
Source: PubMed Central journal article supplement — Drug Des Devel Ther. 2019 Jan 22;13:423–33. doi: 10.2147/DDDT.S189476 (PMC6349410; doi:10.2147/dddt.s189476), 2019-01-22
Supplement: DDDT-13-423-189476.pdf [file DDDT-13-423-189476.pdf]

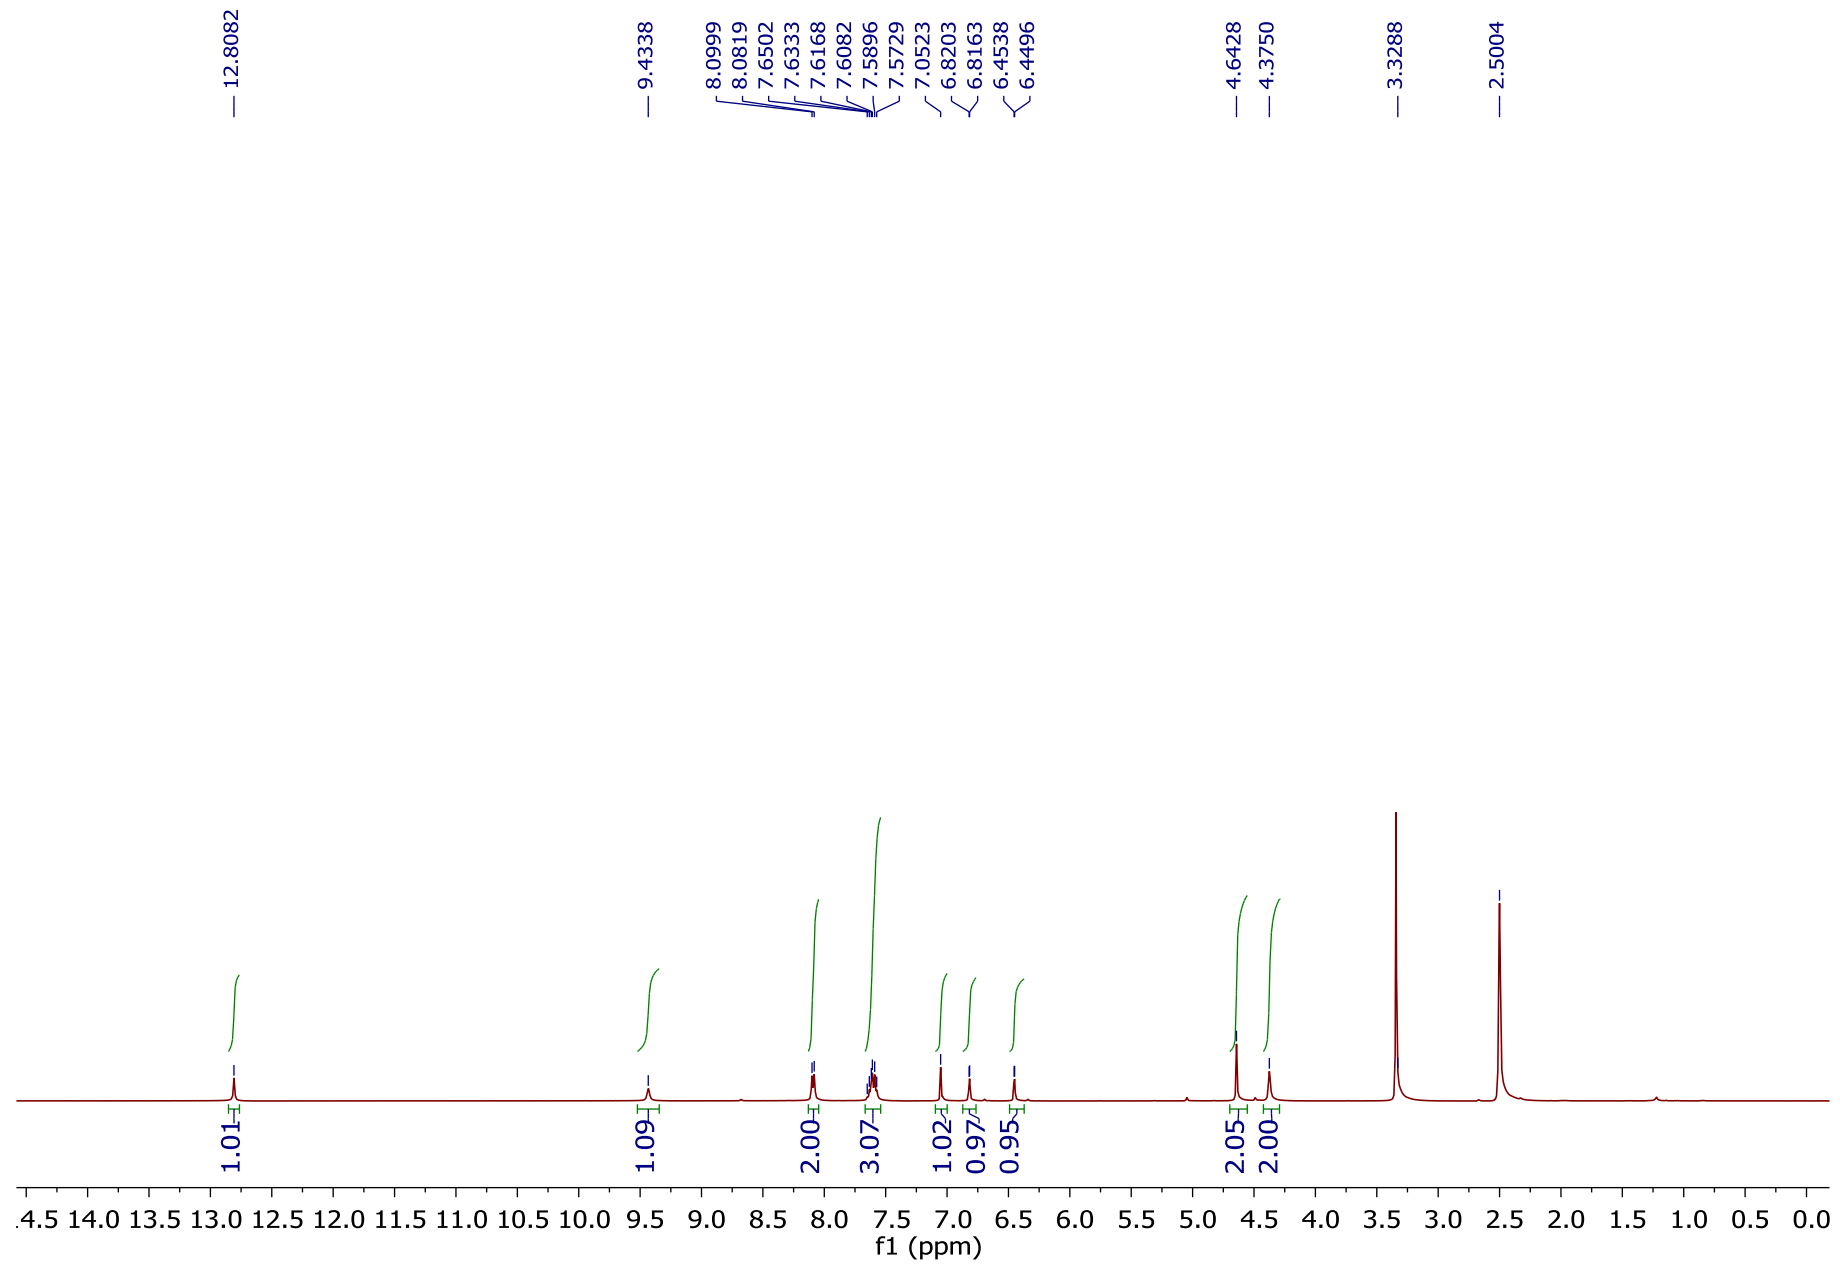

**S1.** <sup>1</sup>H NMR of Compound 5

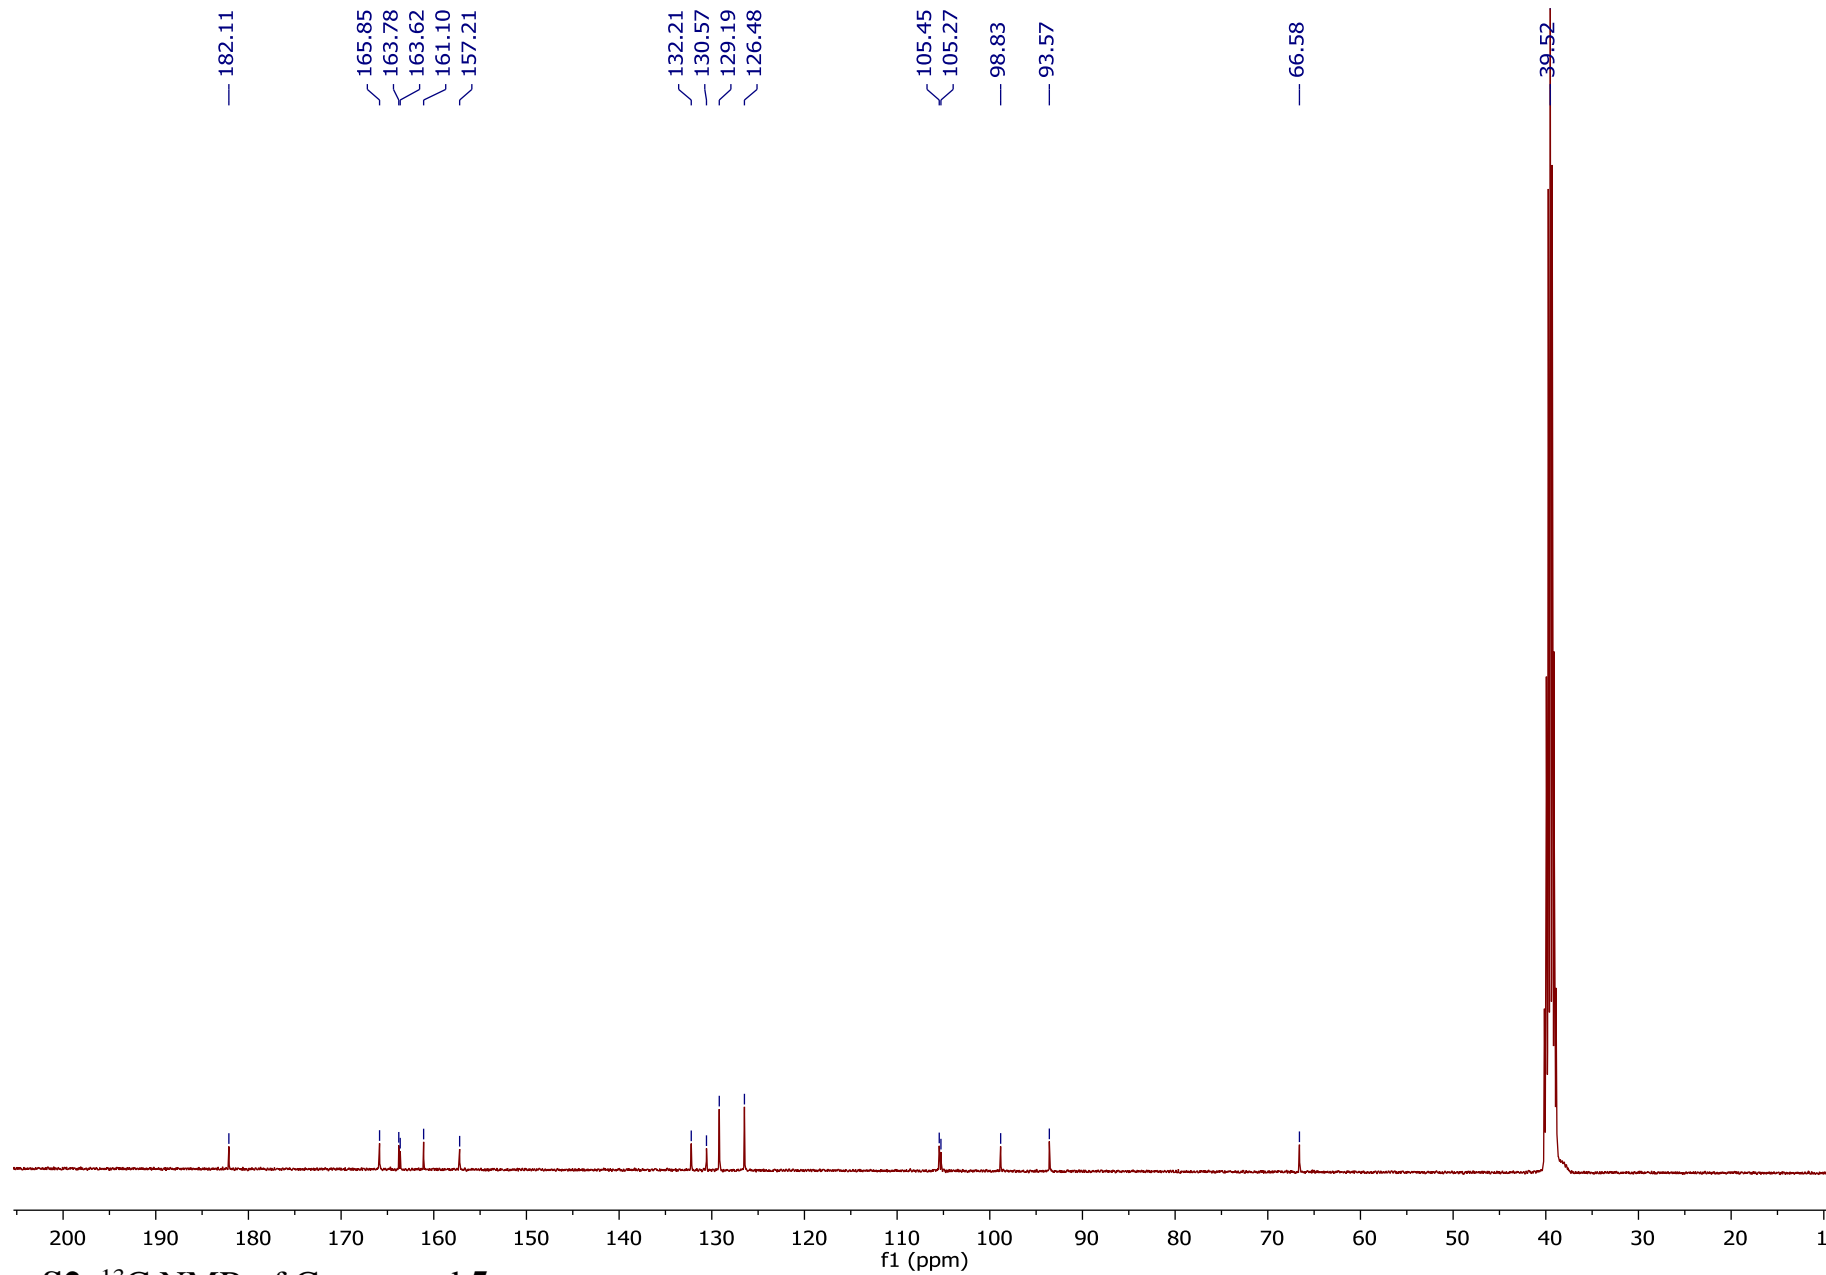

S2.  $^{13}\text{C}$  NMR of Compound 5

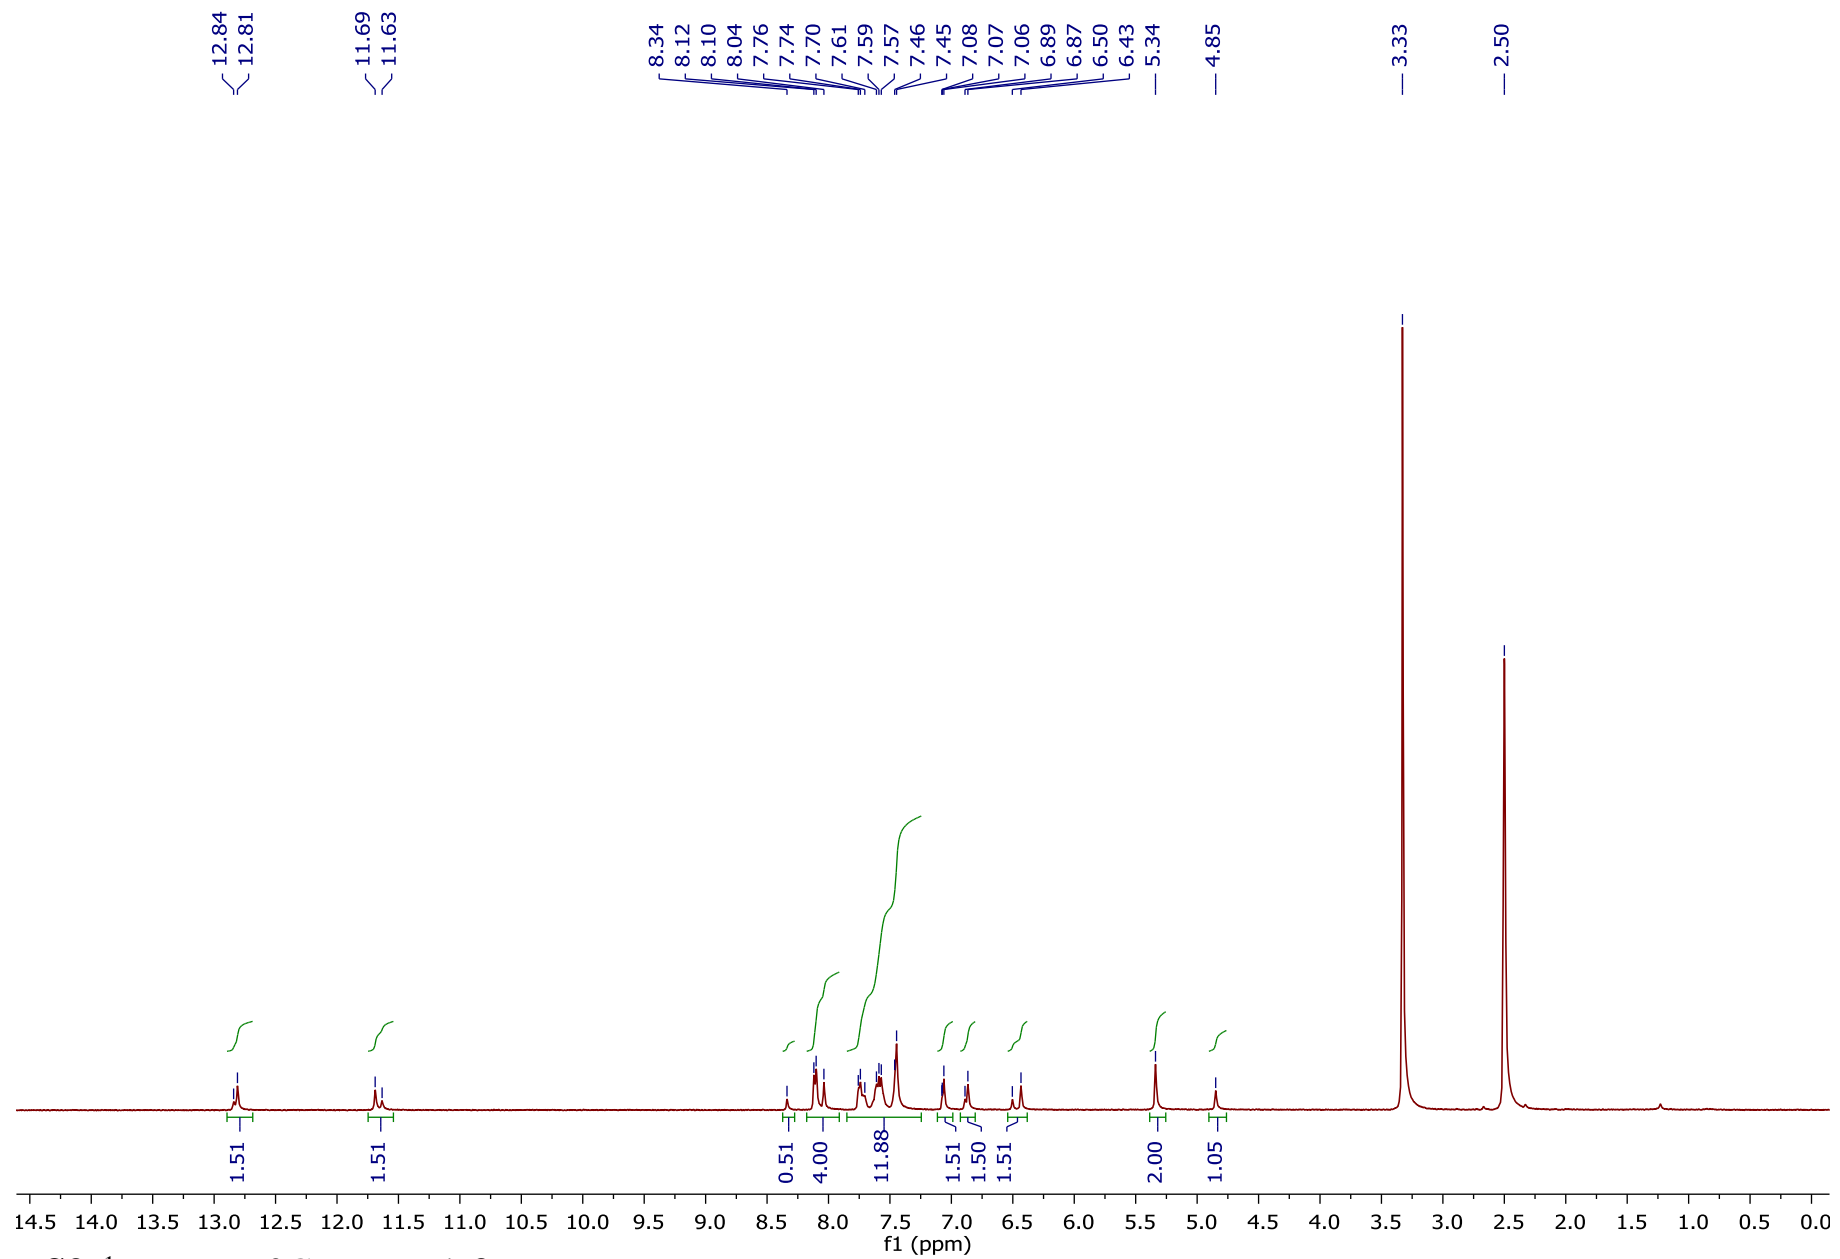

S3. <sup>1</sup>H NMR of Compound 3a

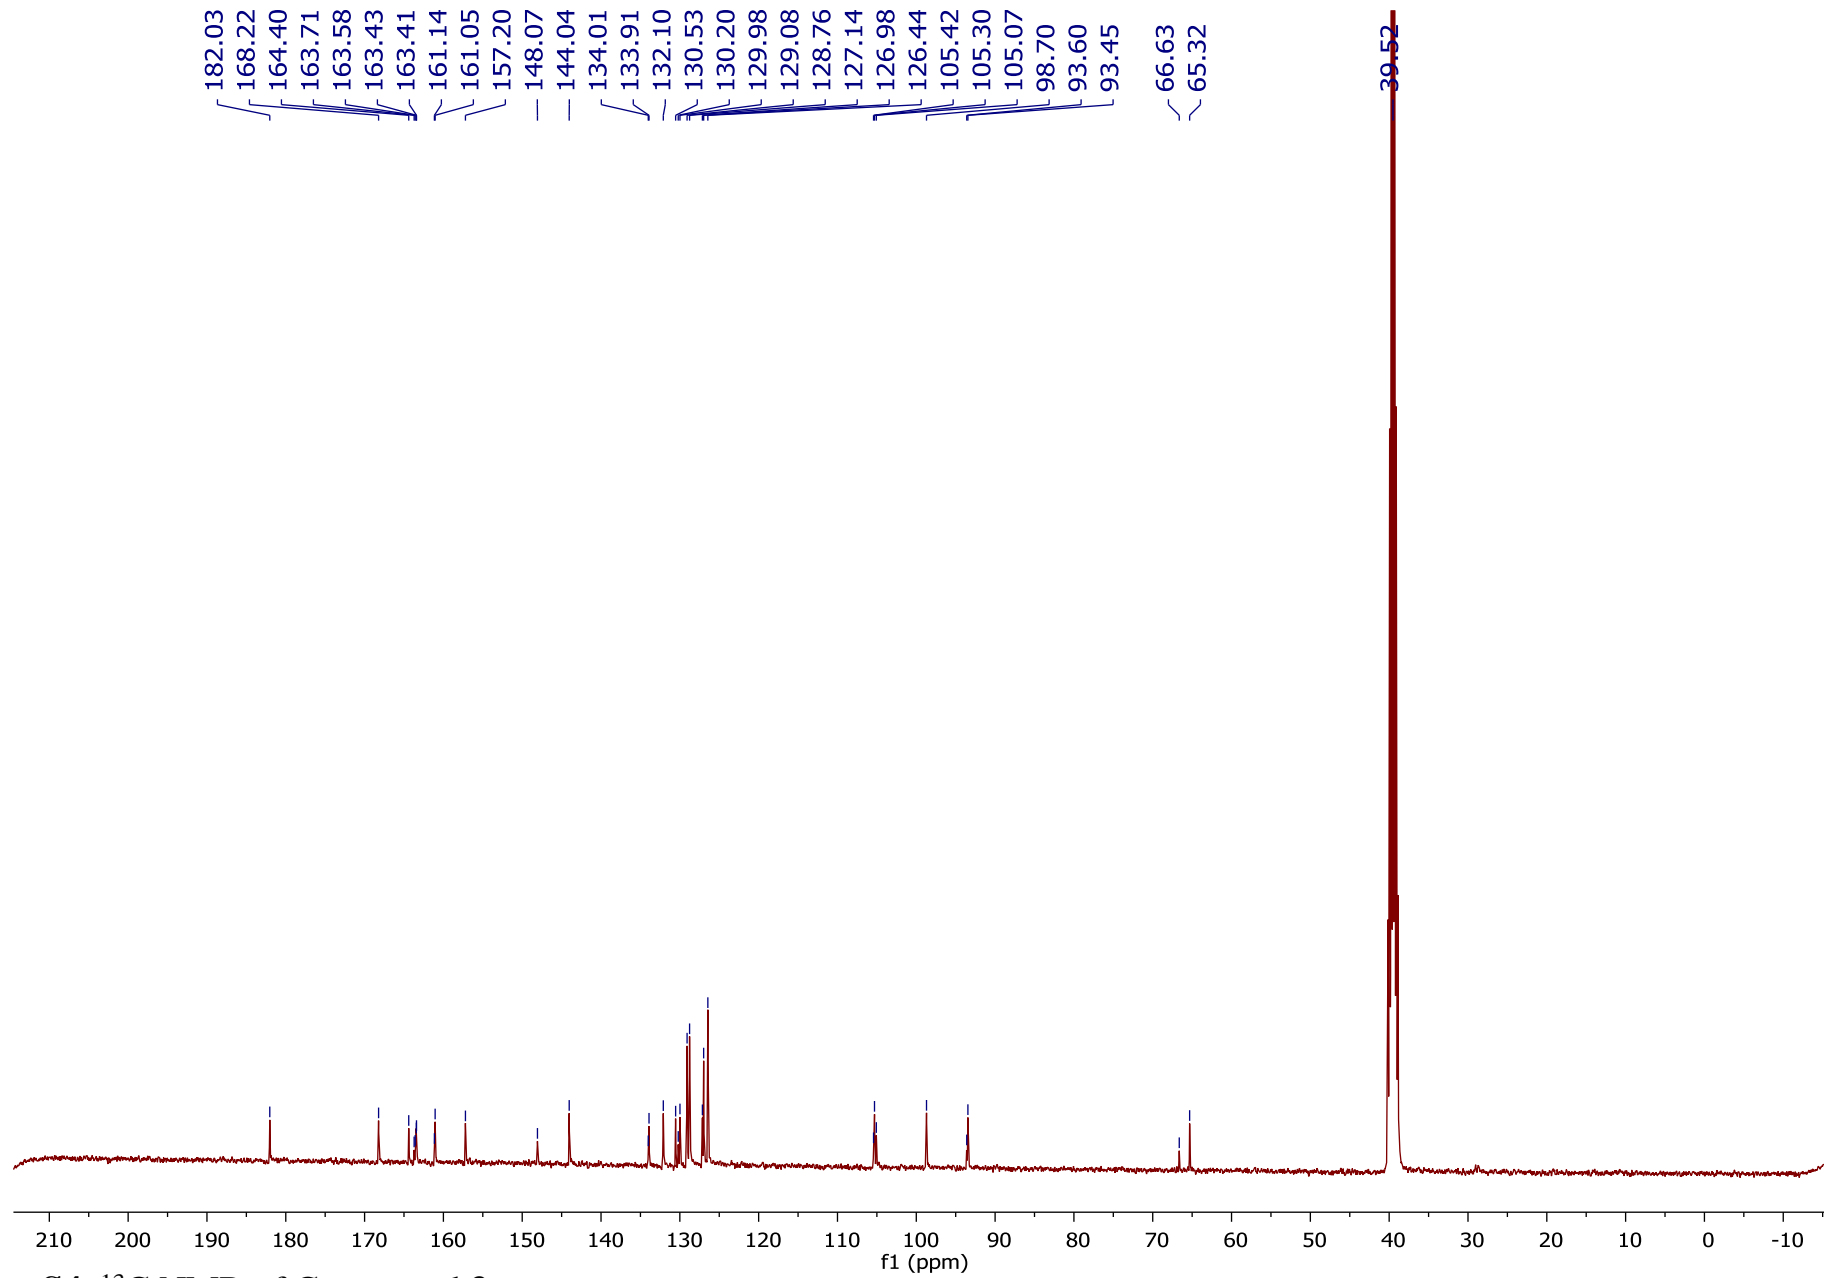

**S4.**  $^{13}\text{C}$  NMR of Compound **3a**

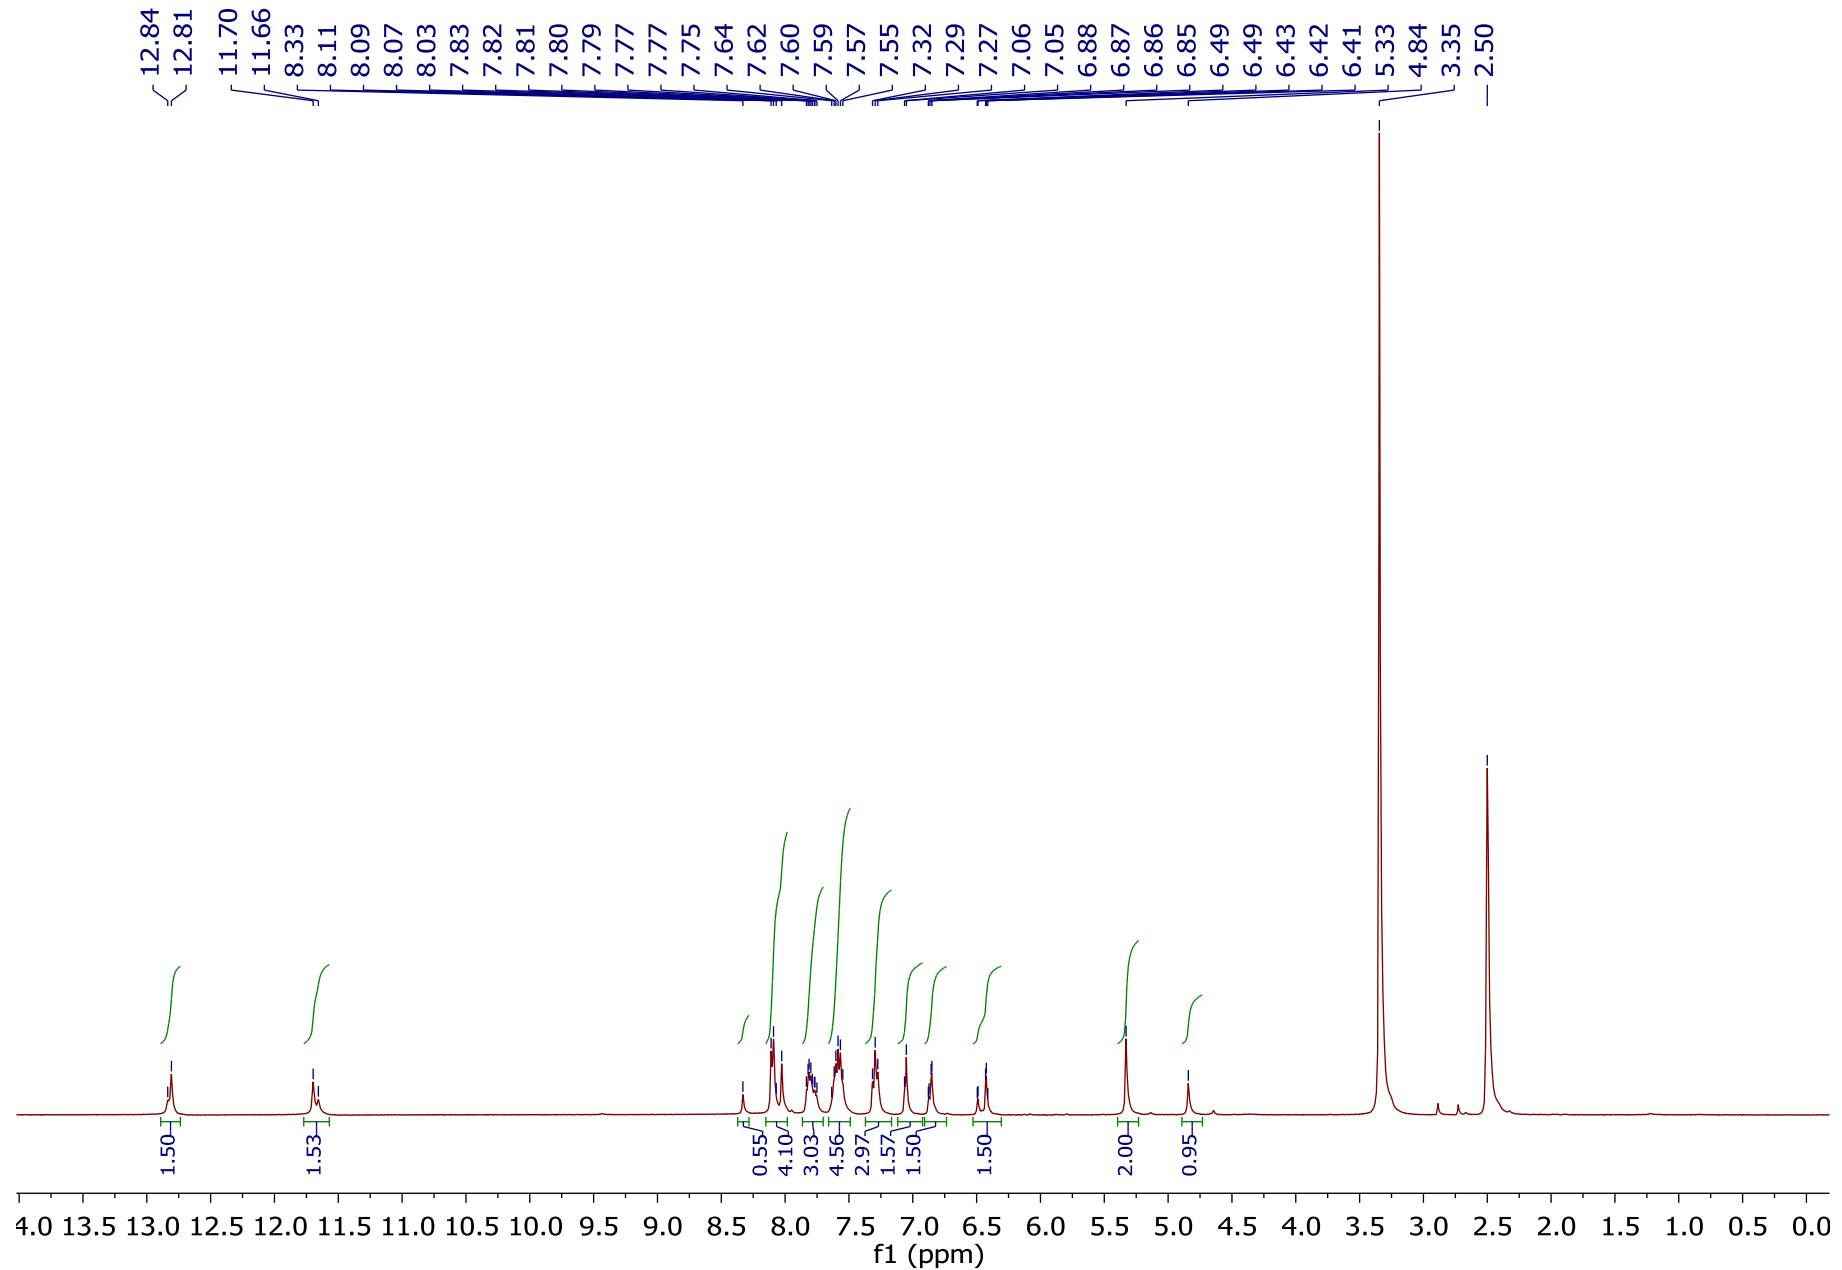

S5. <sup>1</sup>H NMR of Compound 3b

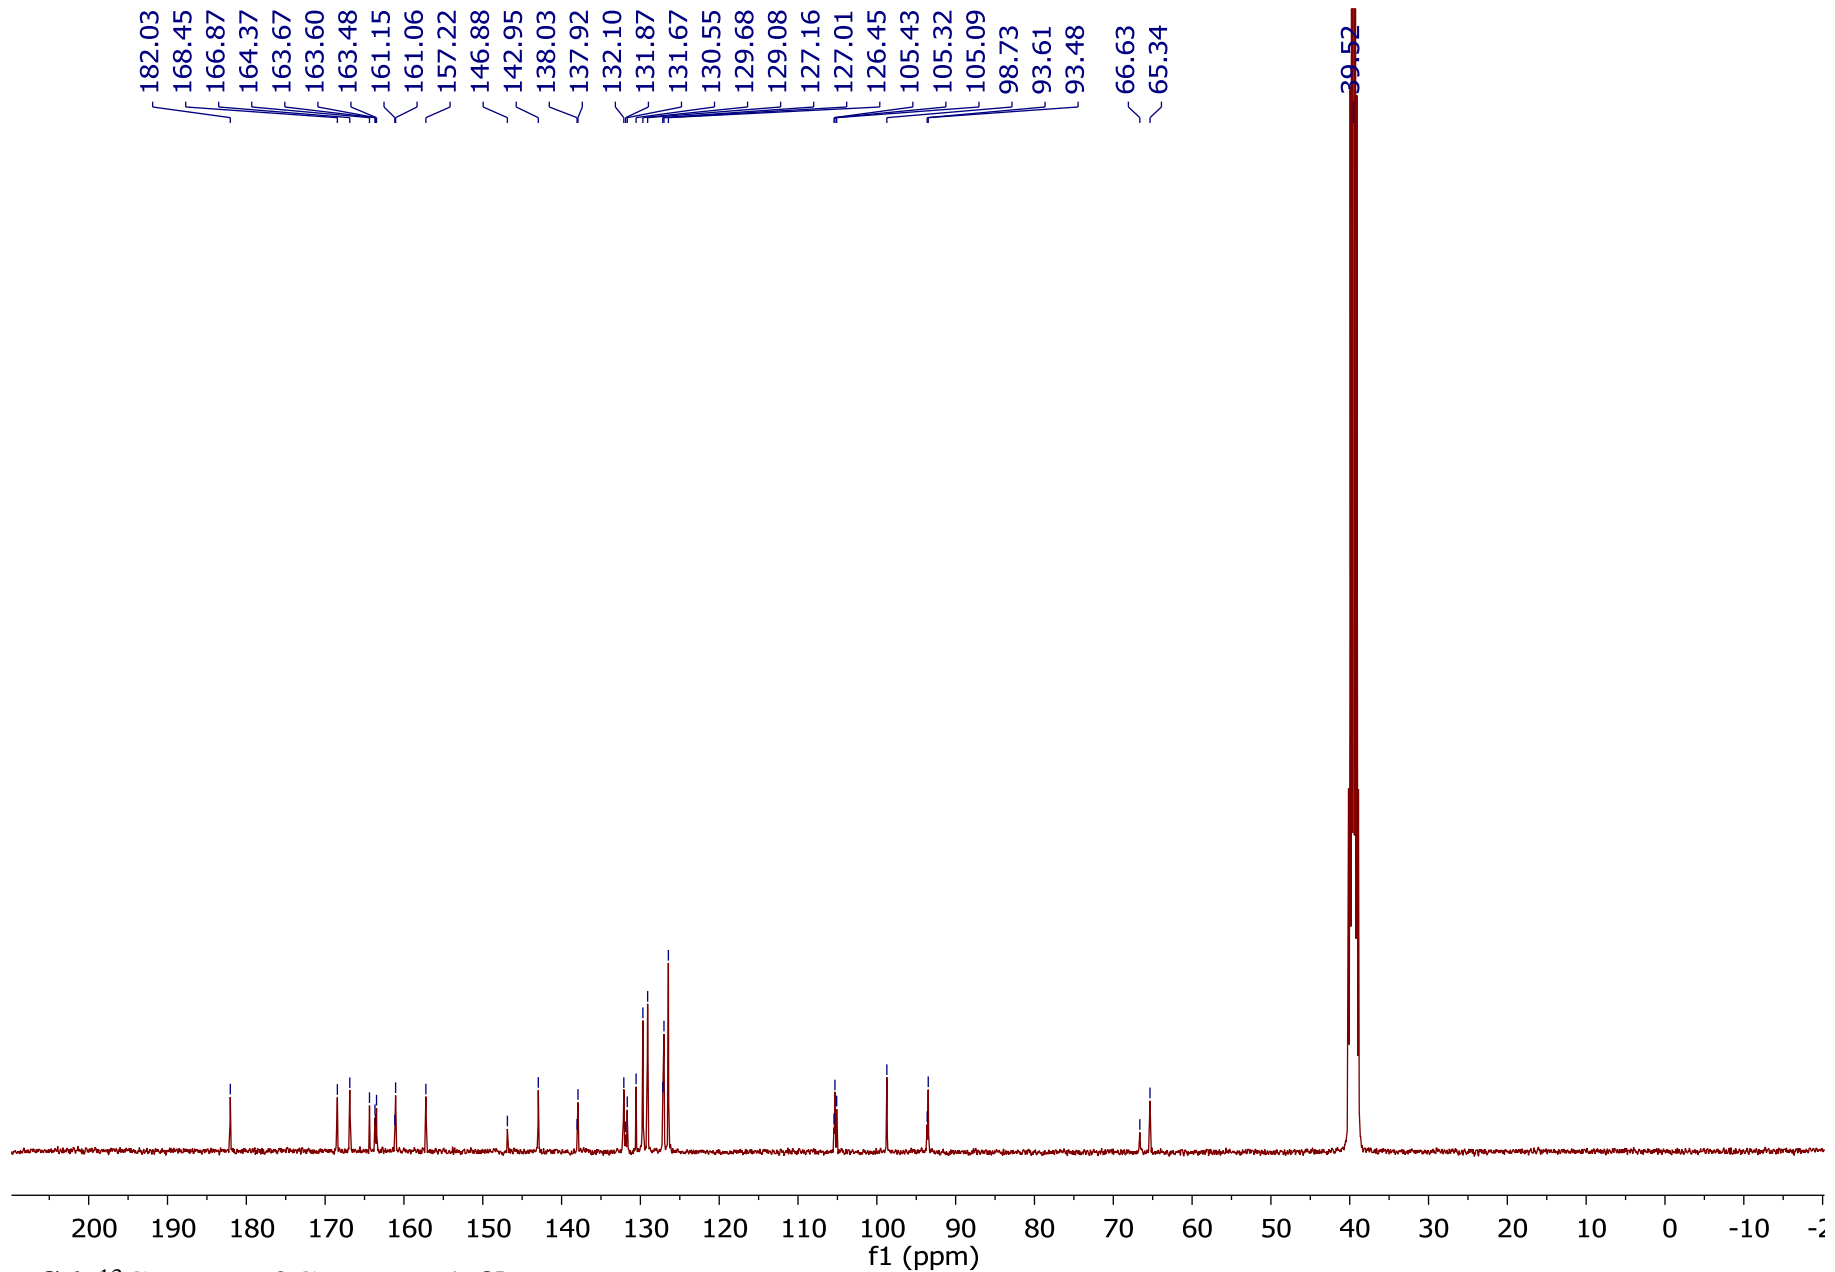

S6.  $^{13}\text{C}$  NMR of Compound **3b**

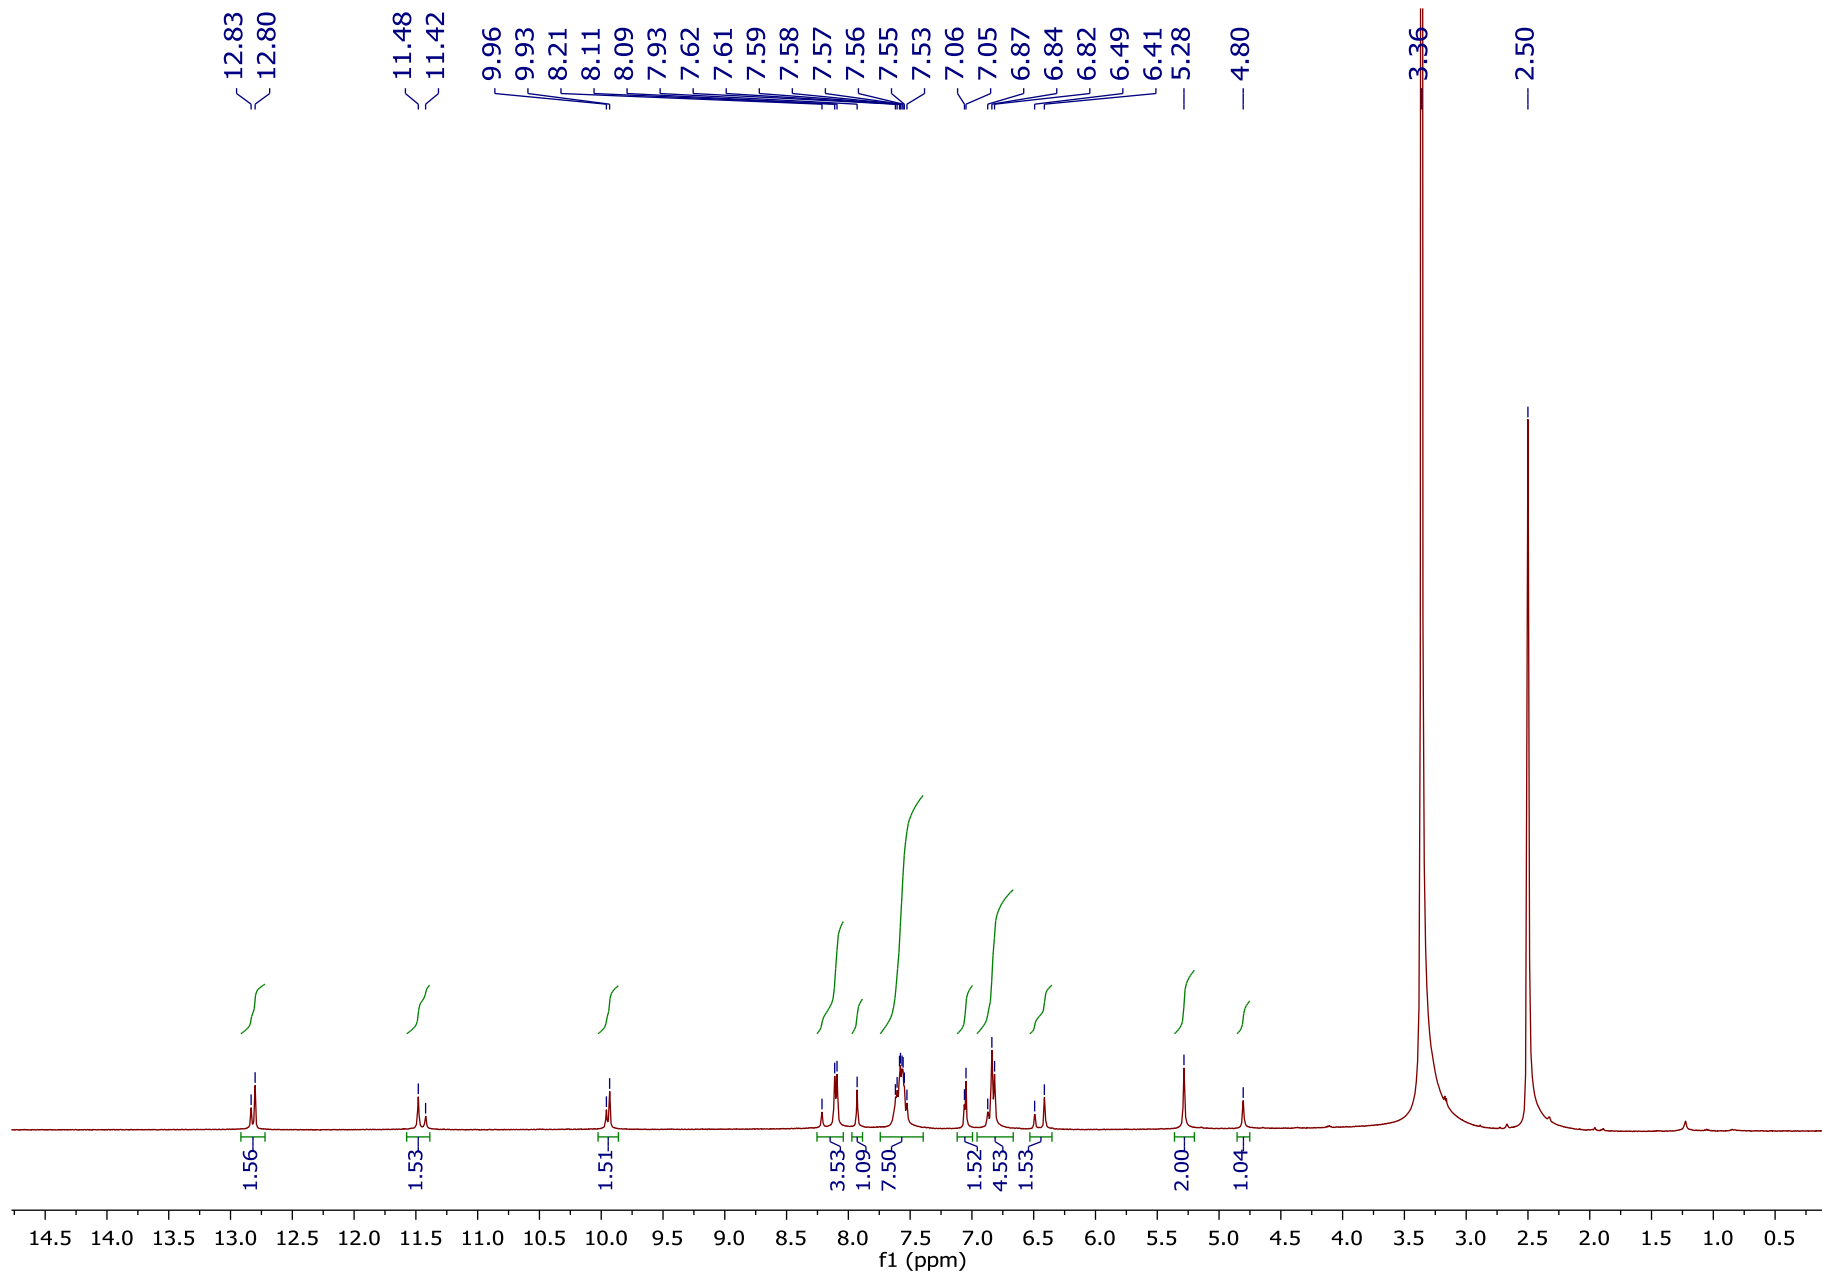

S7. <sup>1</sup>H NMR of Compound 3c

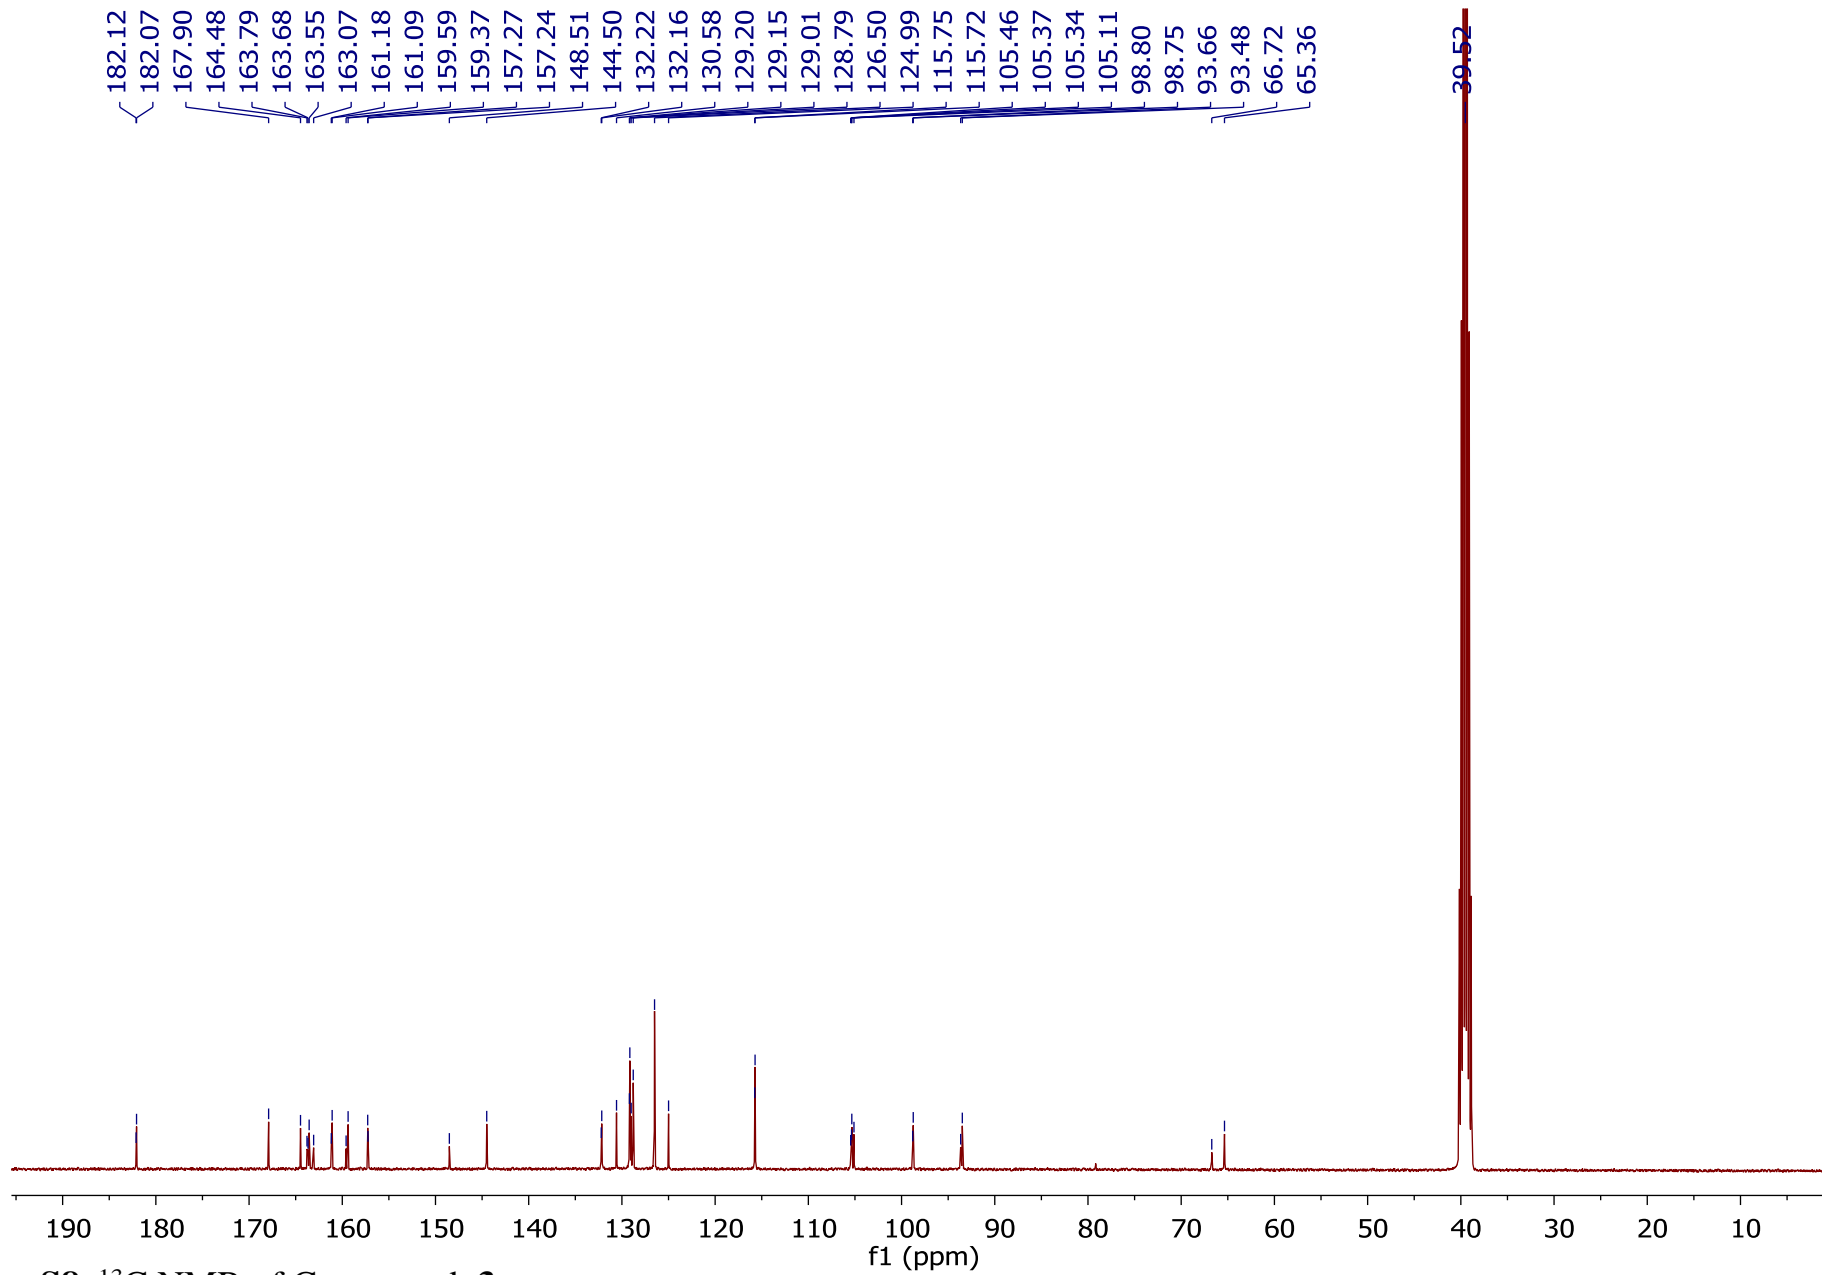

S8.  $^{13}\text{C}$  NMR of Compound **3c**



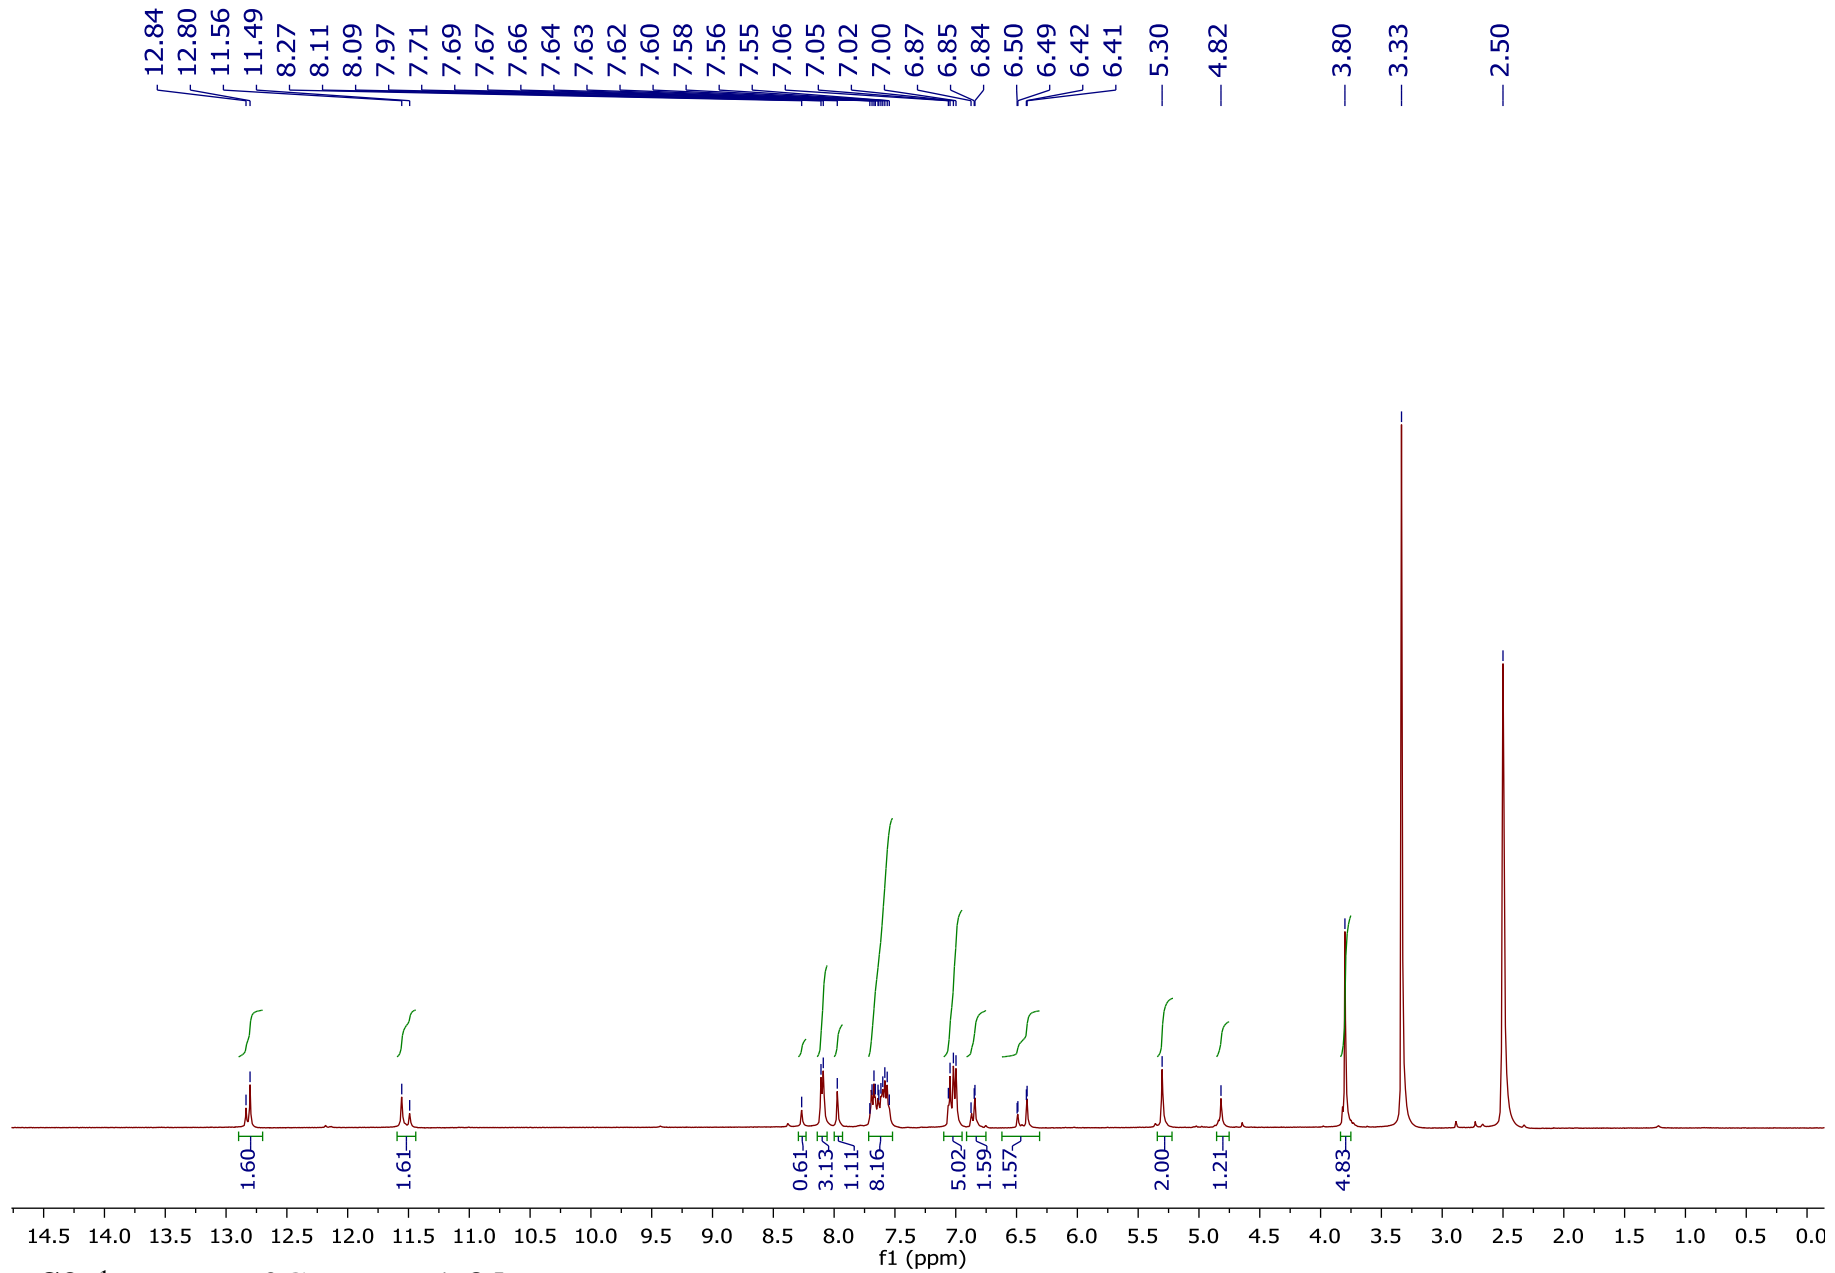

S9. <sup>1</sup>H NMR of Compound 3d

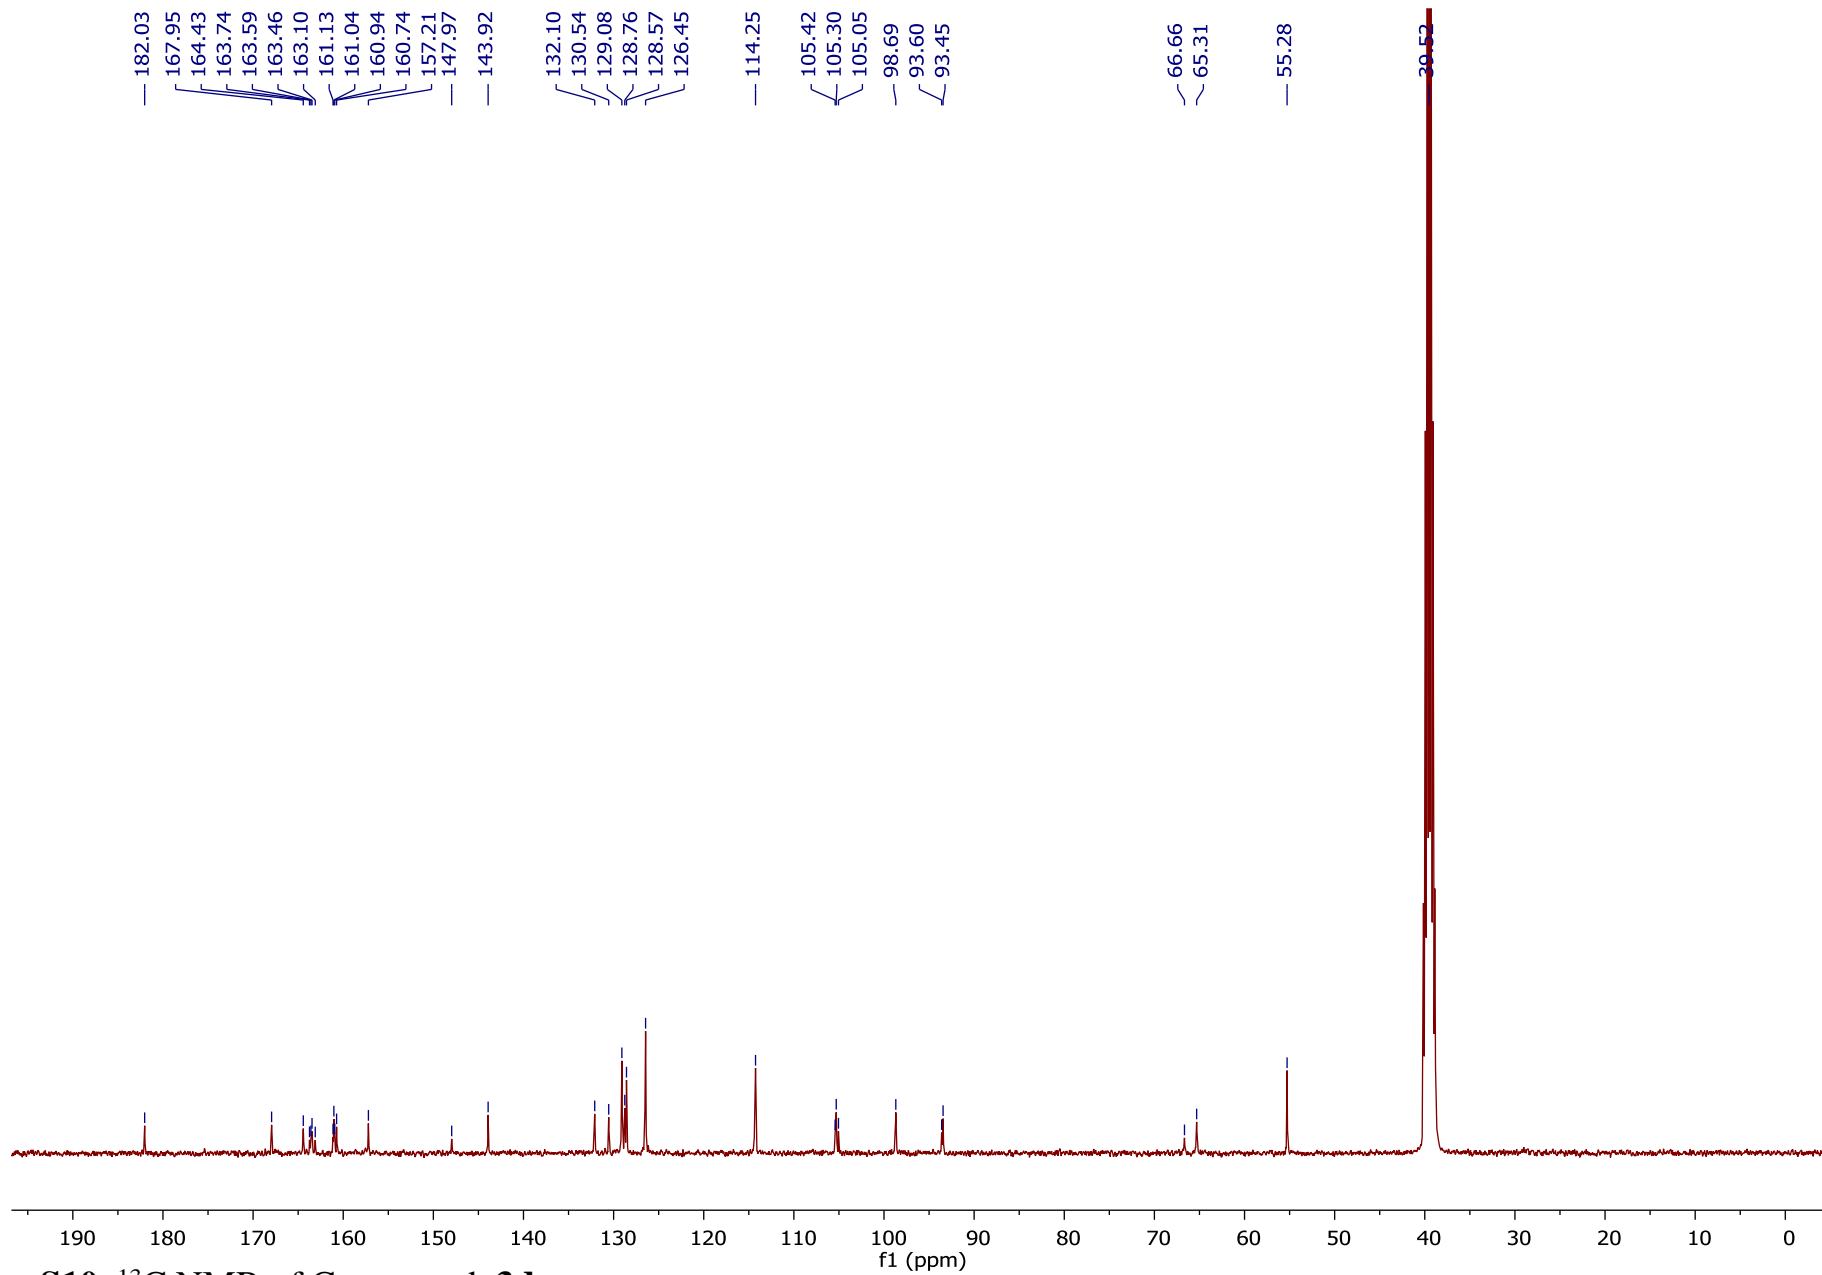

**S10.**  $^{13}\text{C}$  NMR of Compound **3d**

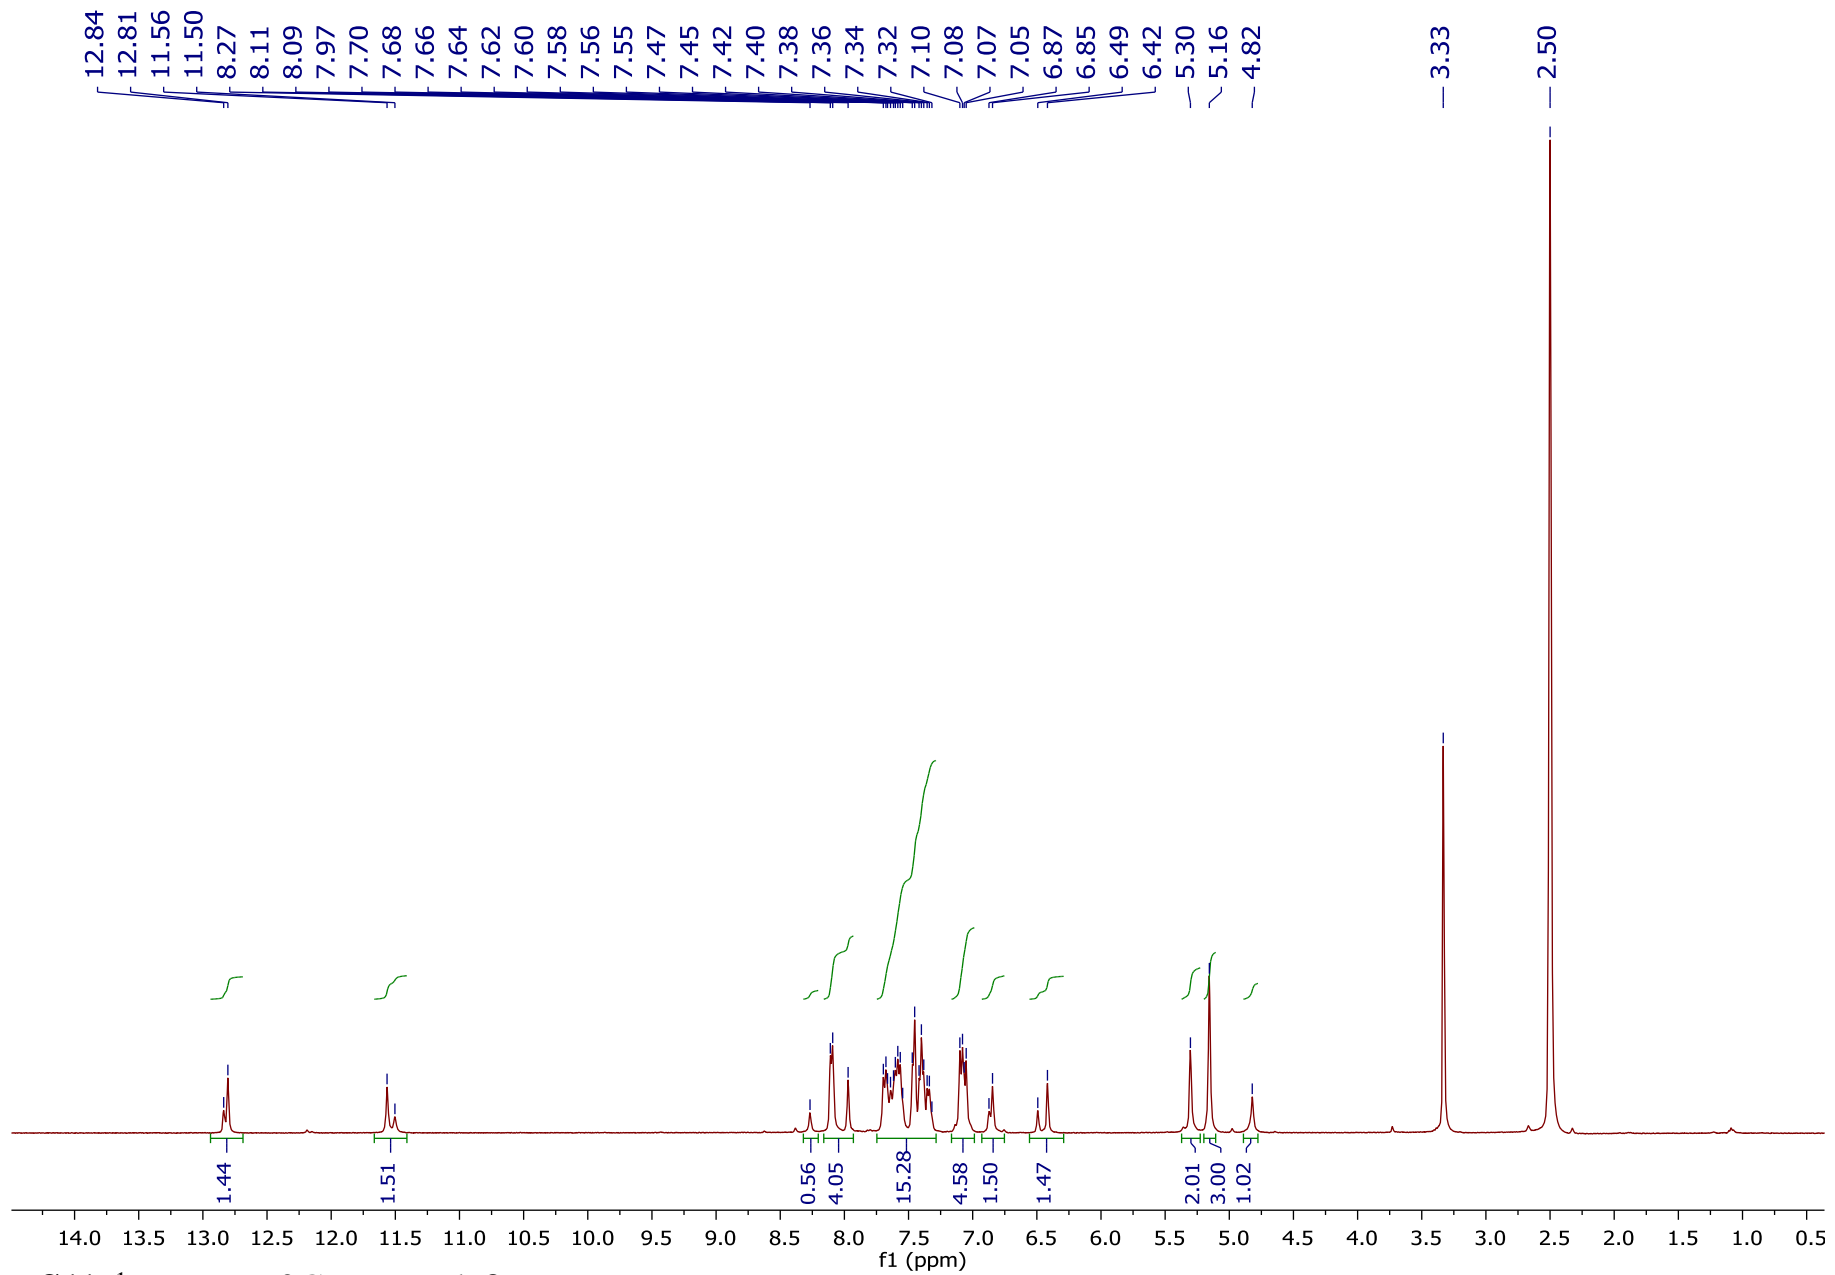

S11. <sup>1</sup>H NMR of Compound 3e

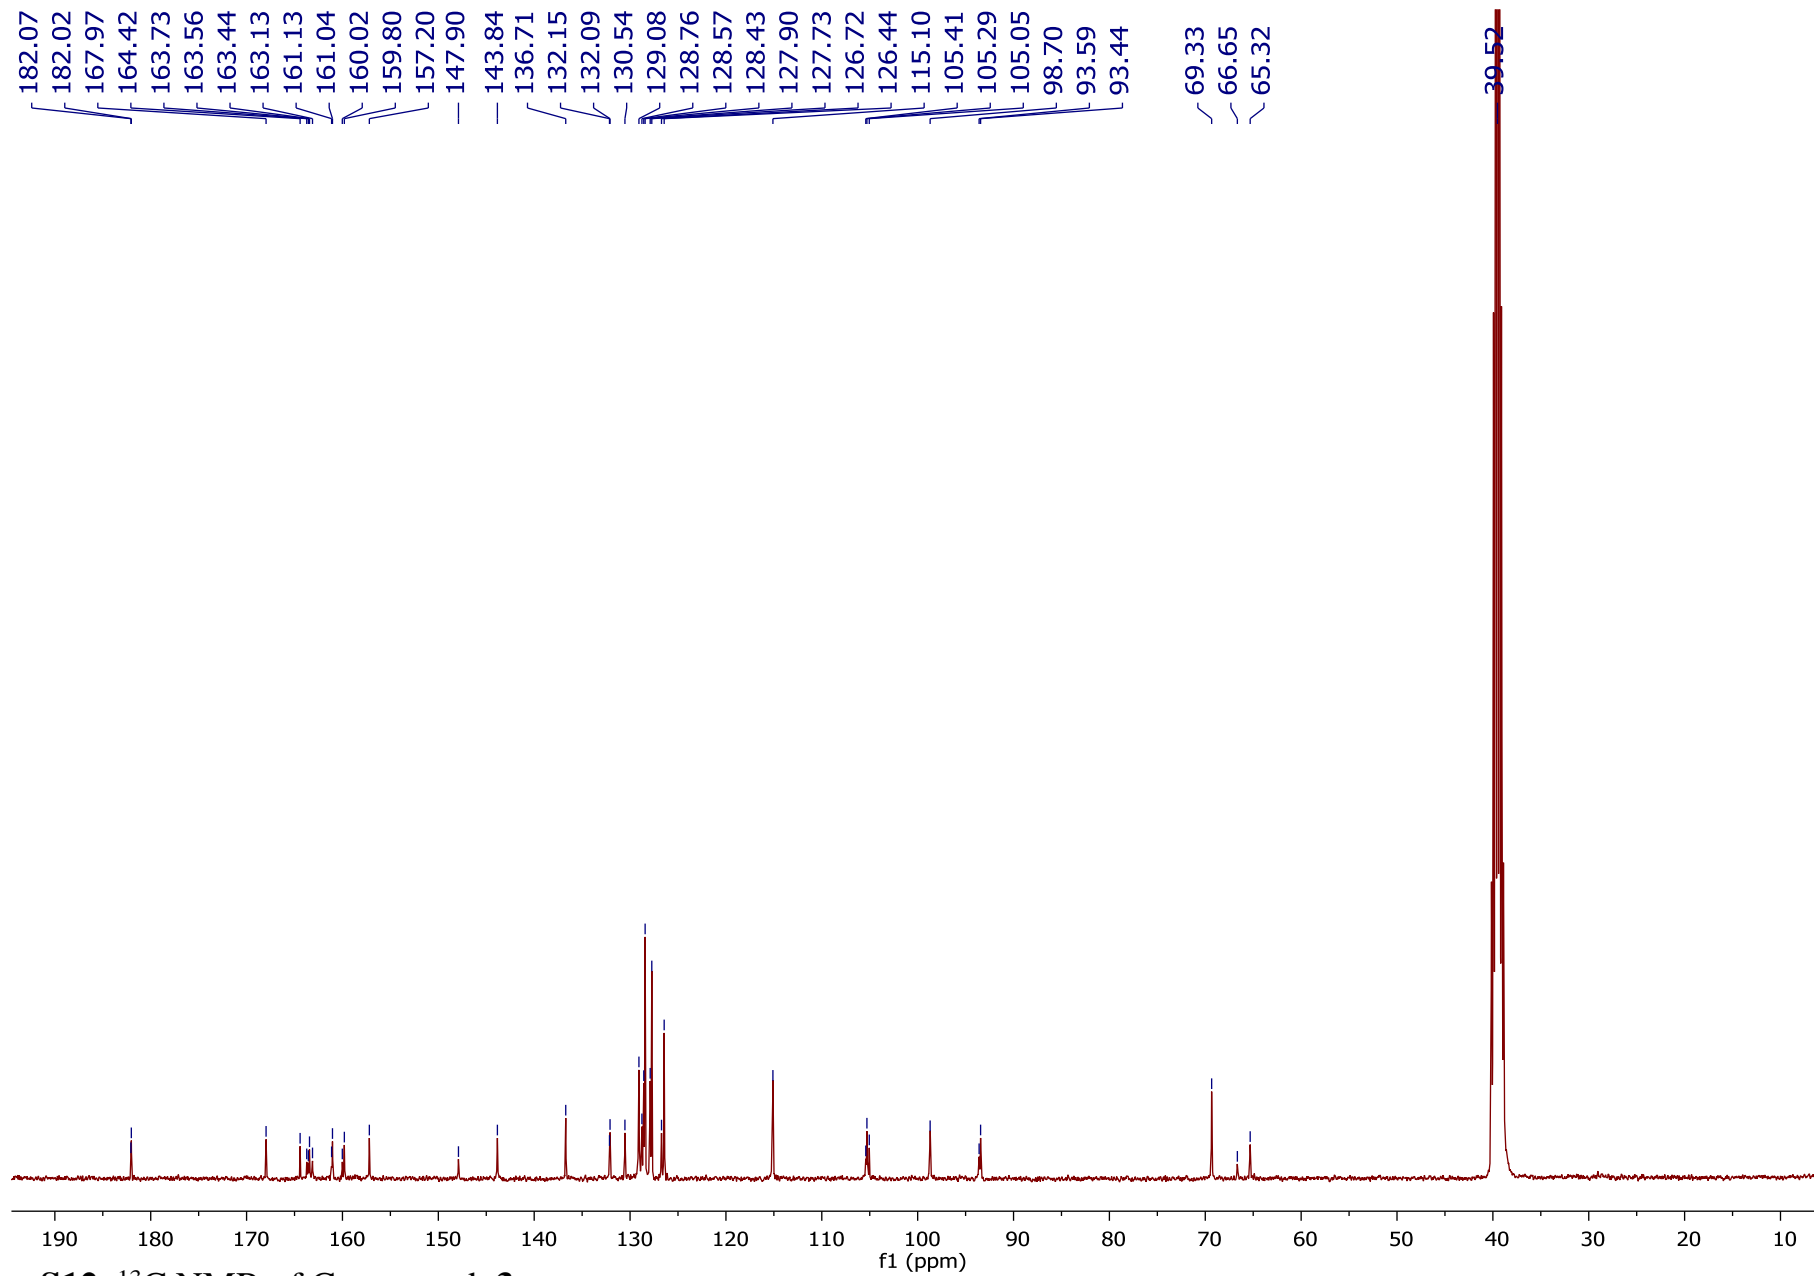

S12. <sup>13</sup>C NMR of Compound 3e

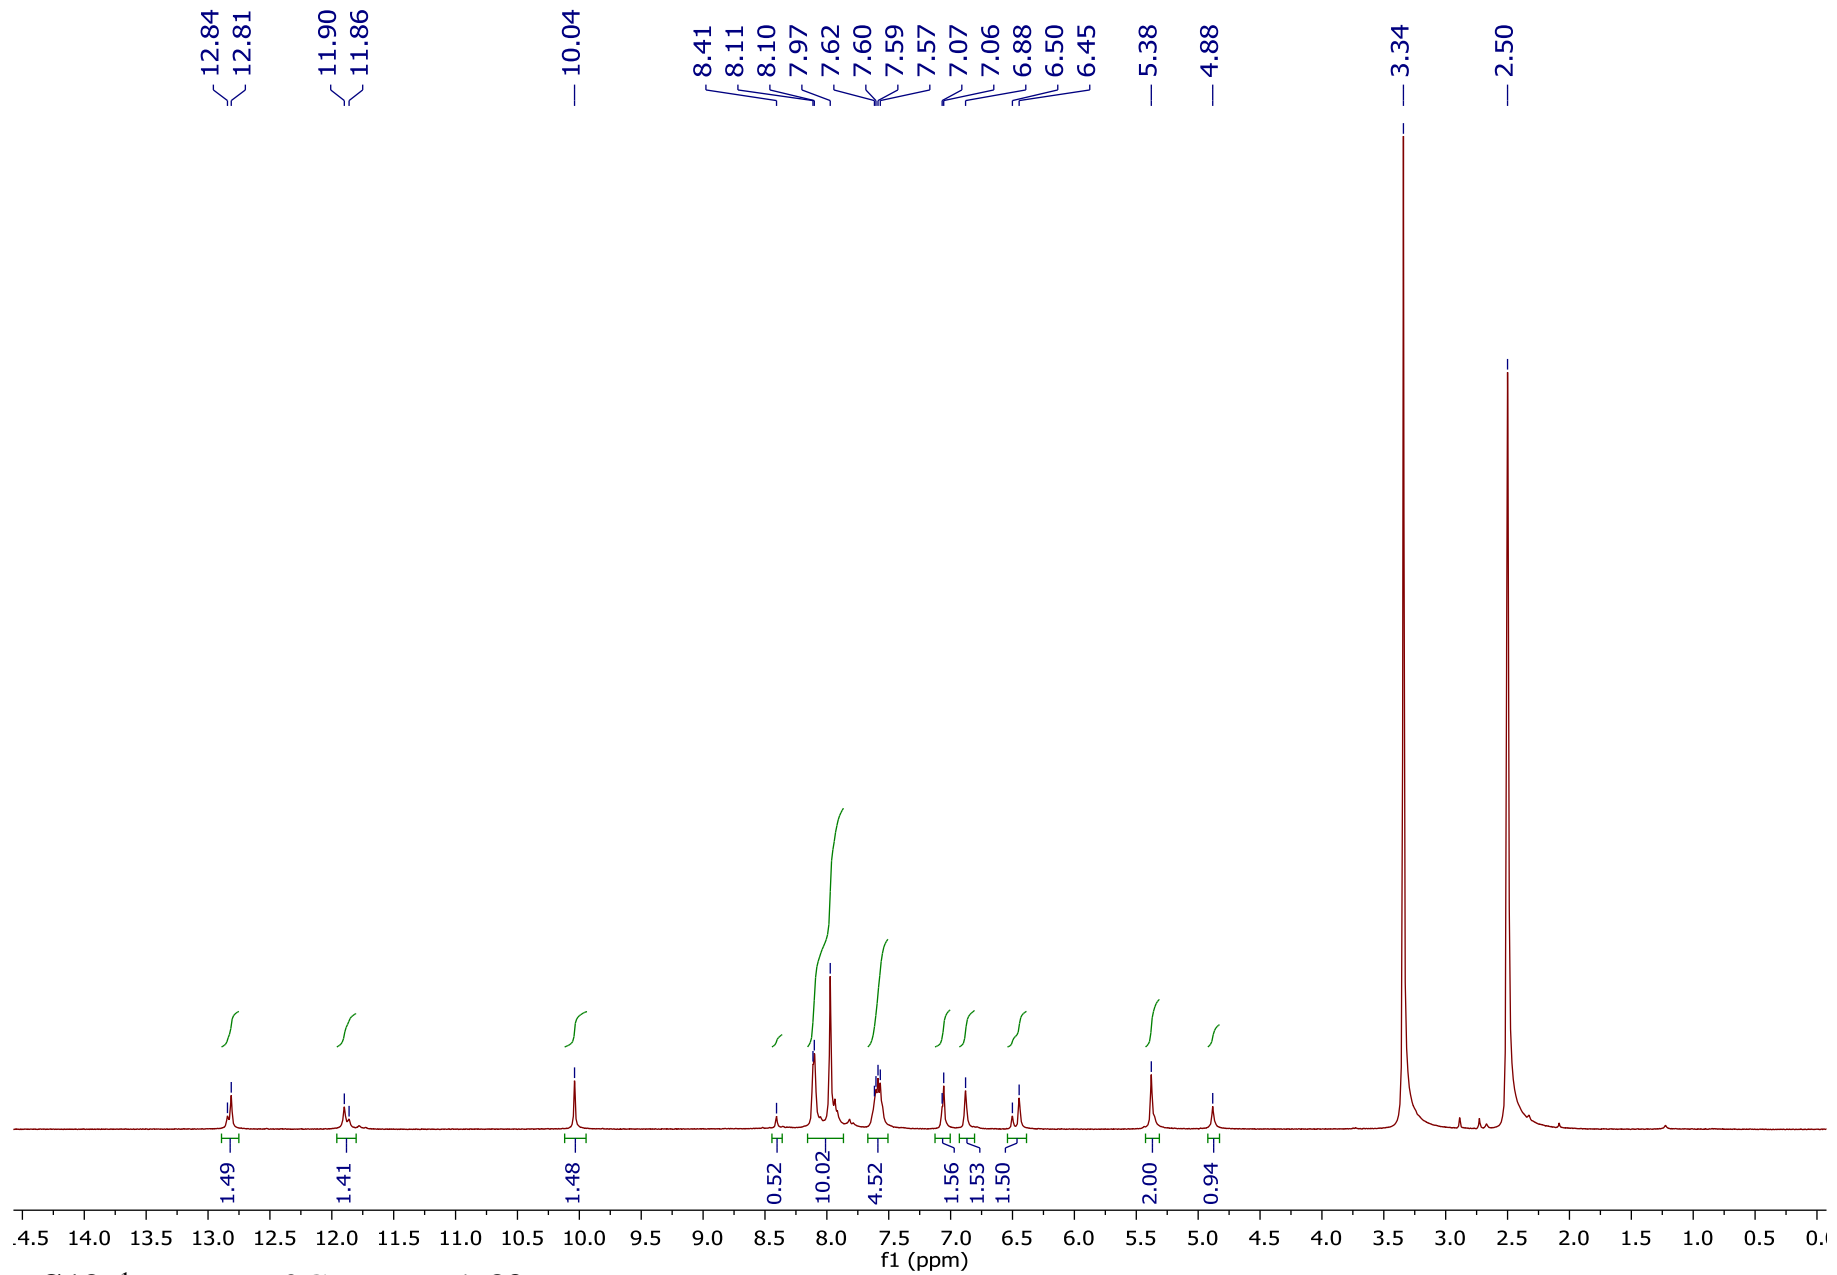

**S13.** <sup>1</sup>H NMR of Compound **3f**

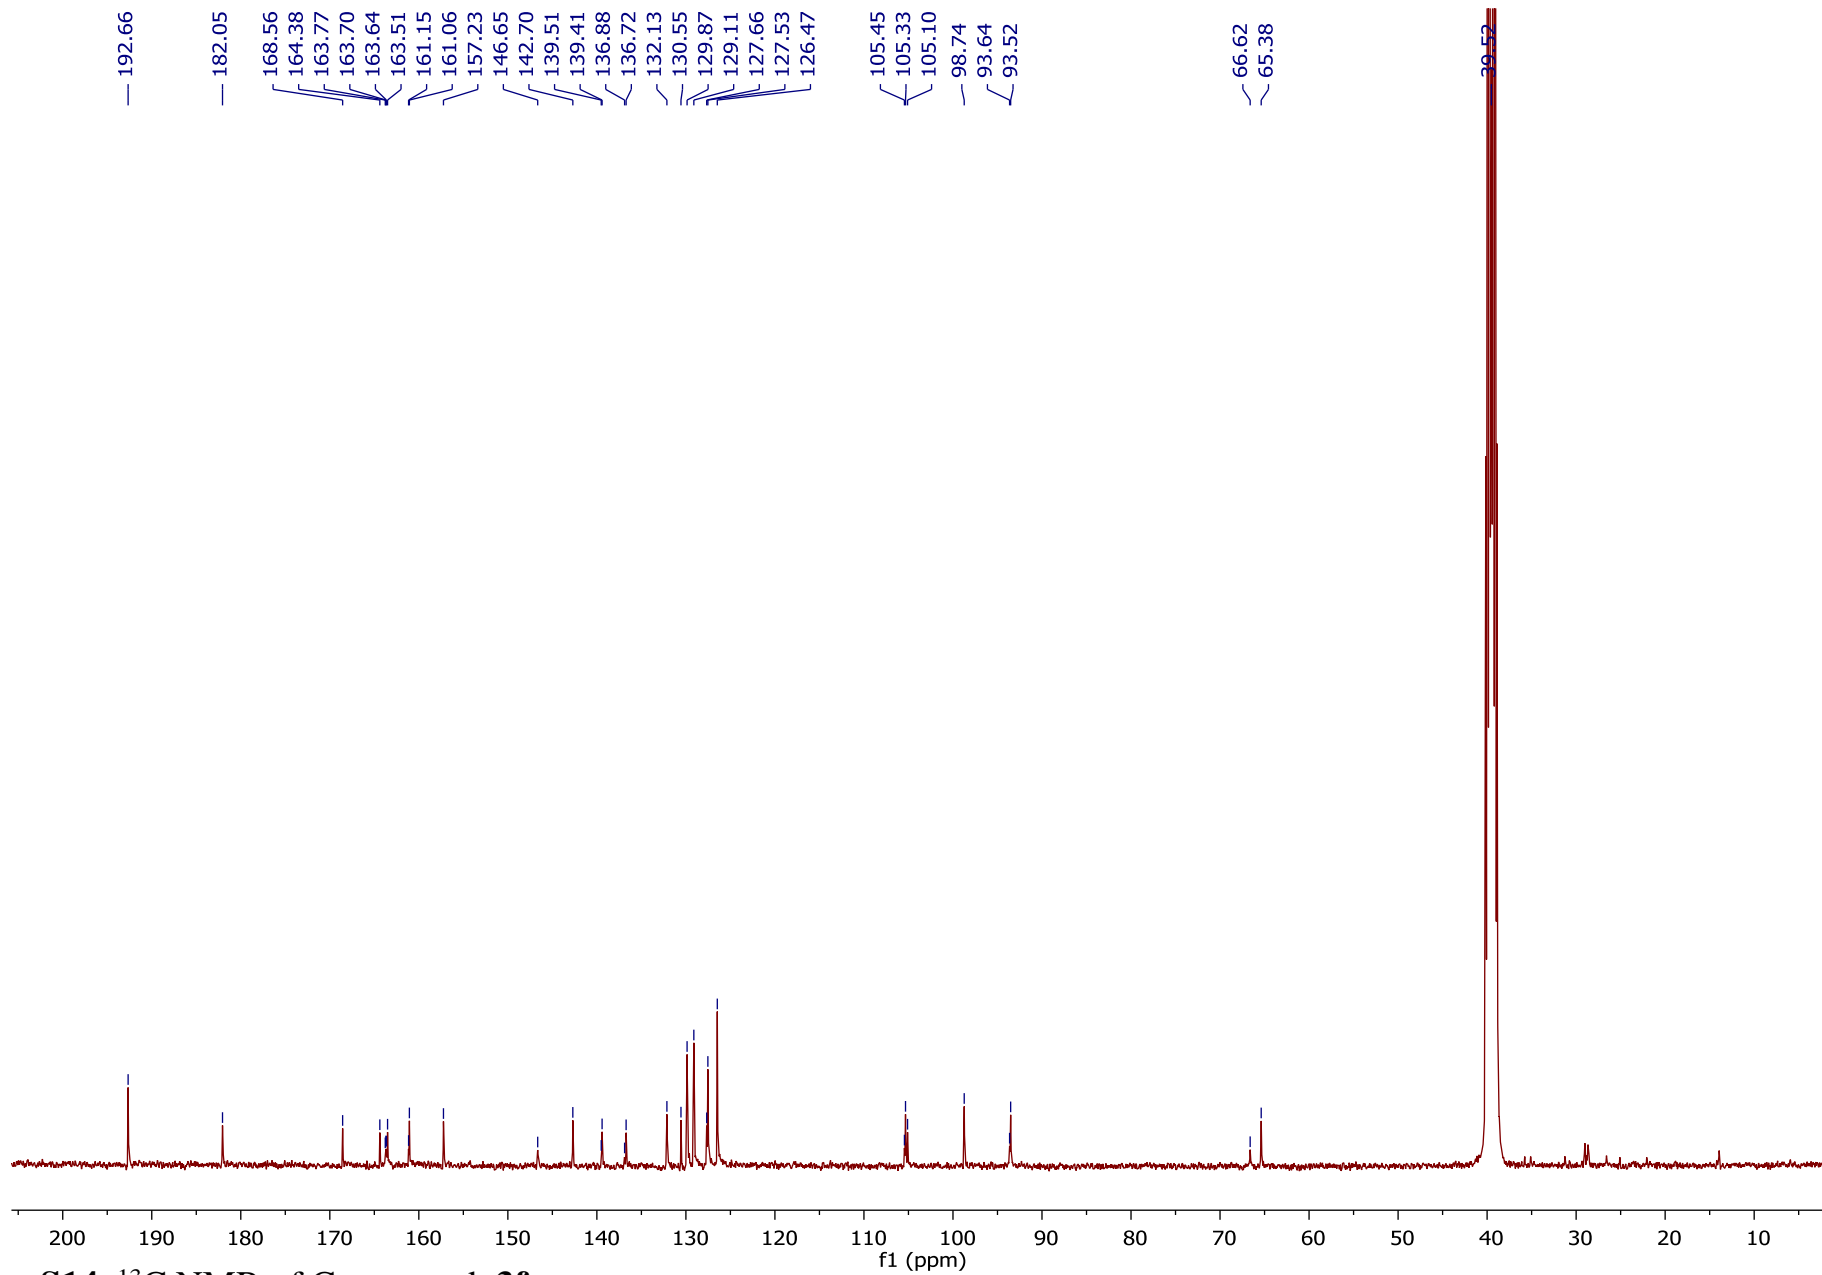

**S14.**  $^{13}\text{C}$  NMR of Compound **3f**

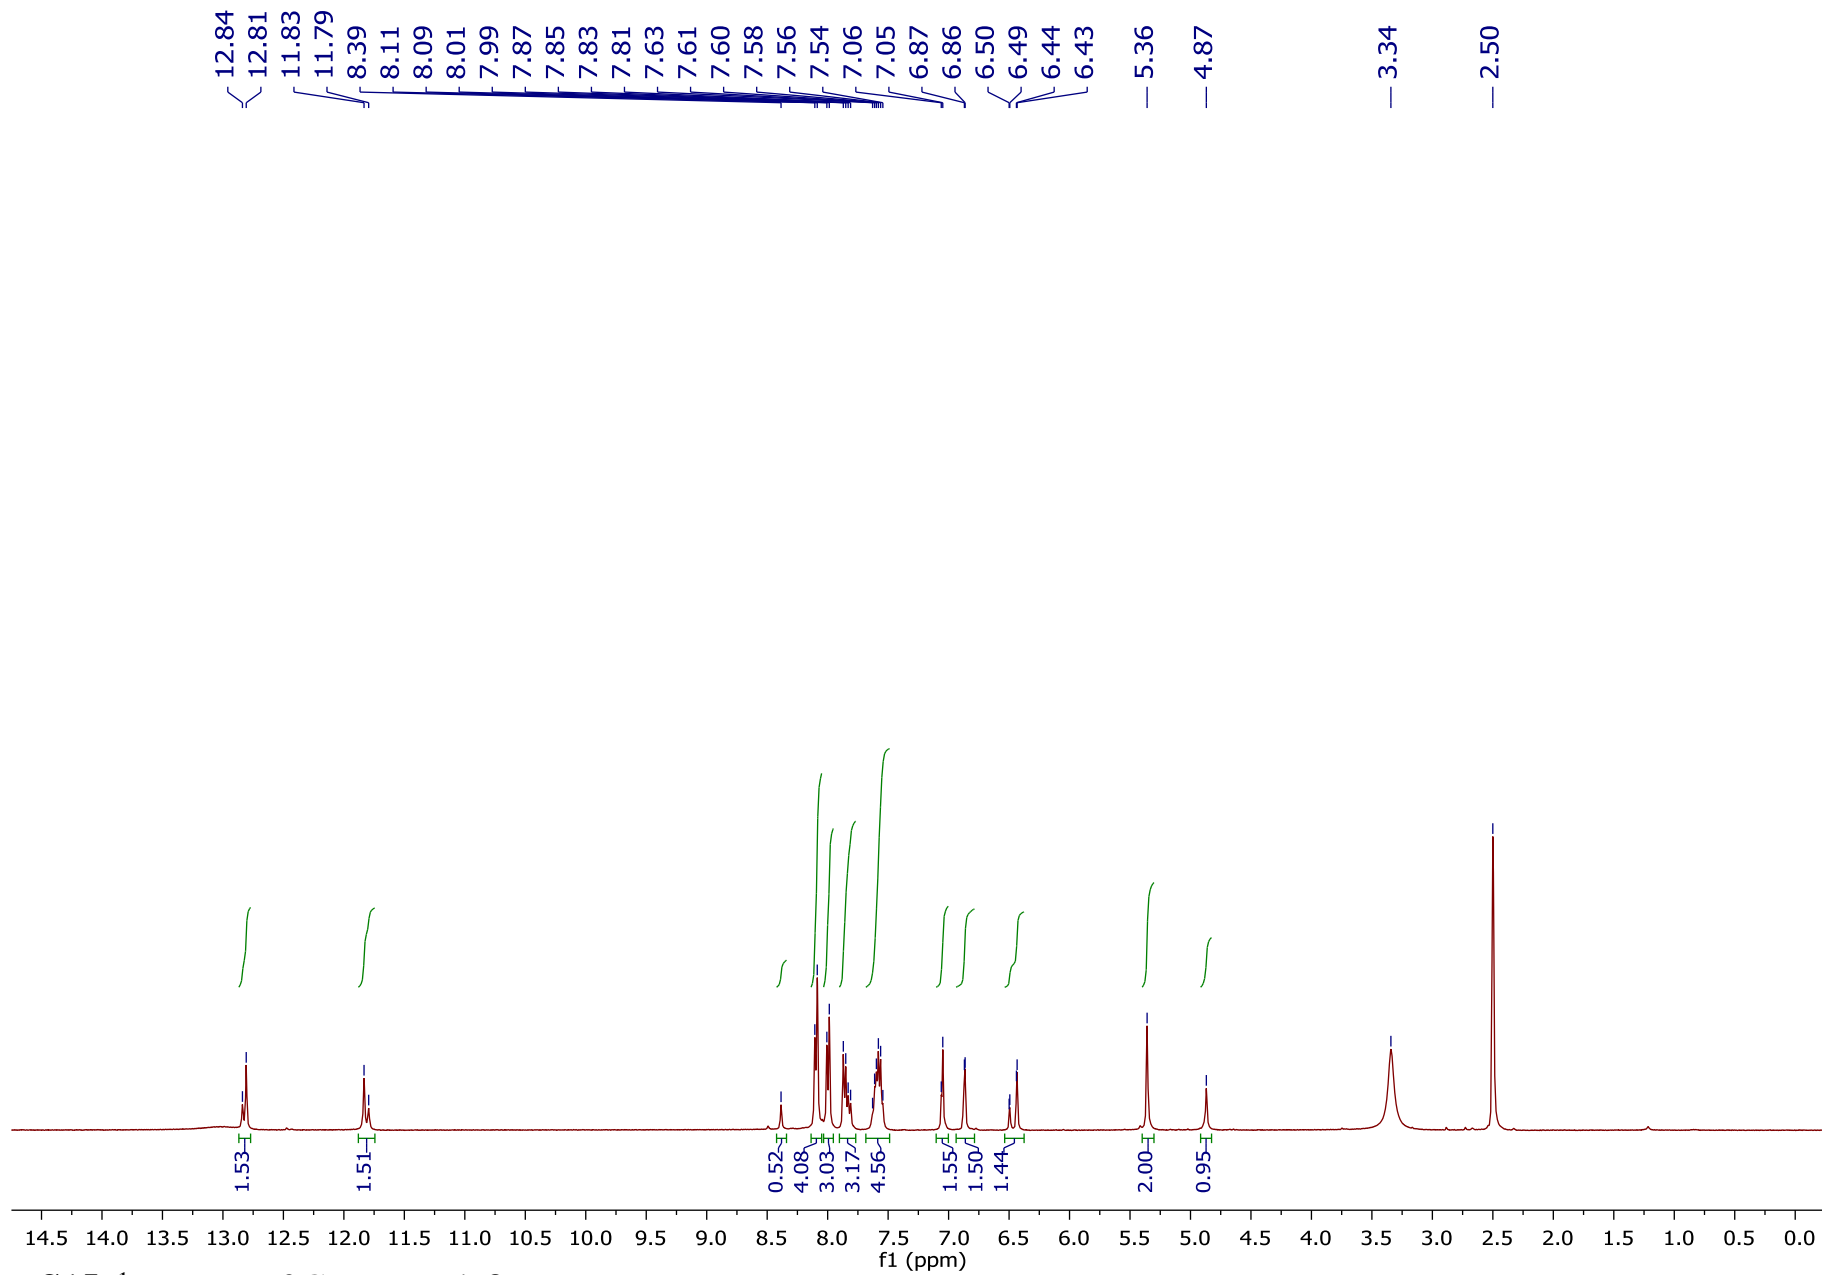

S15. <sup>1</sup>H NMR of Compound 3g

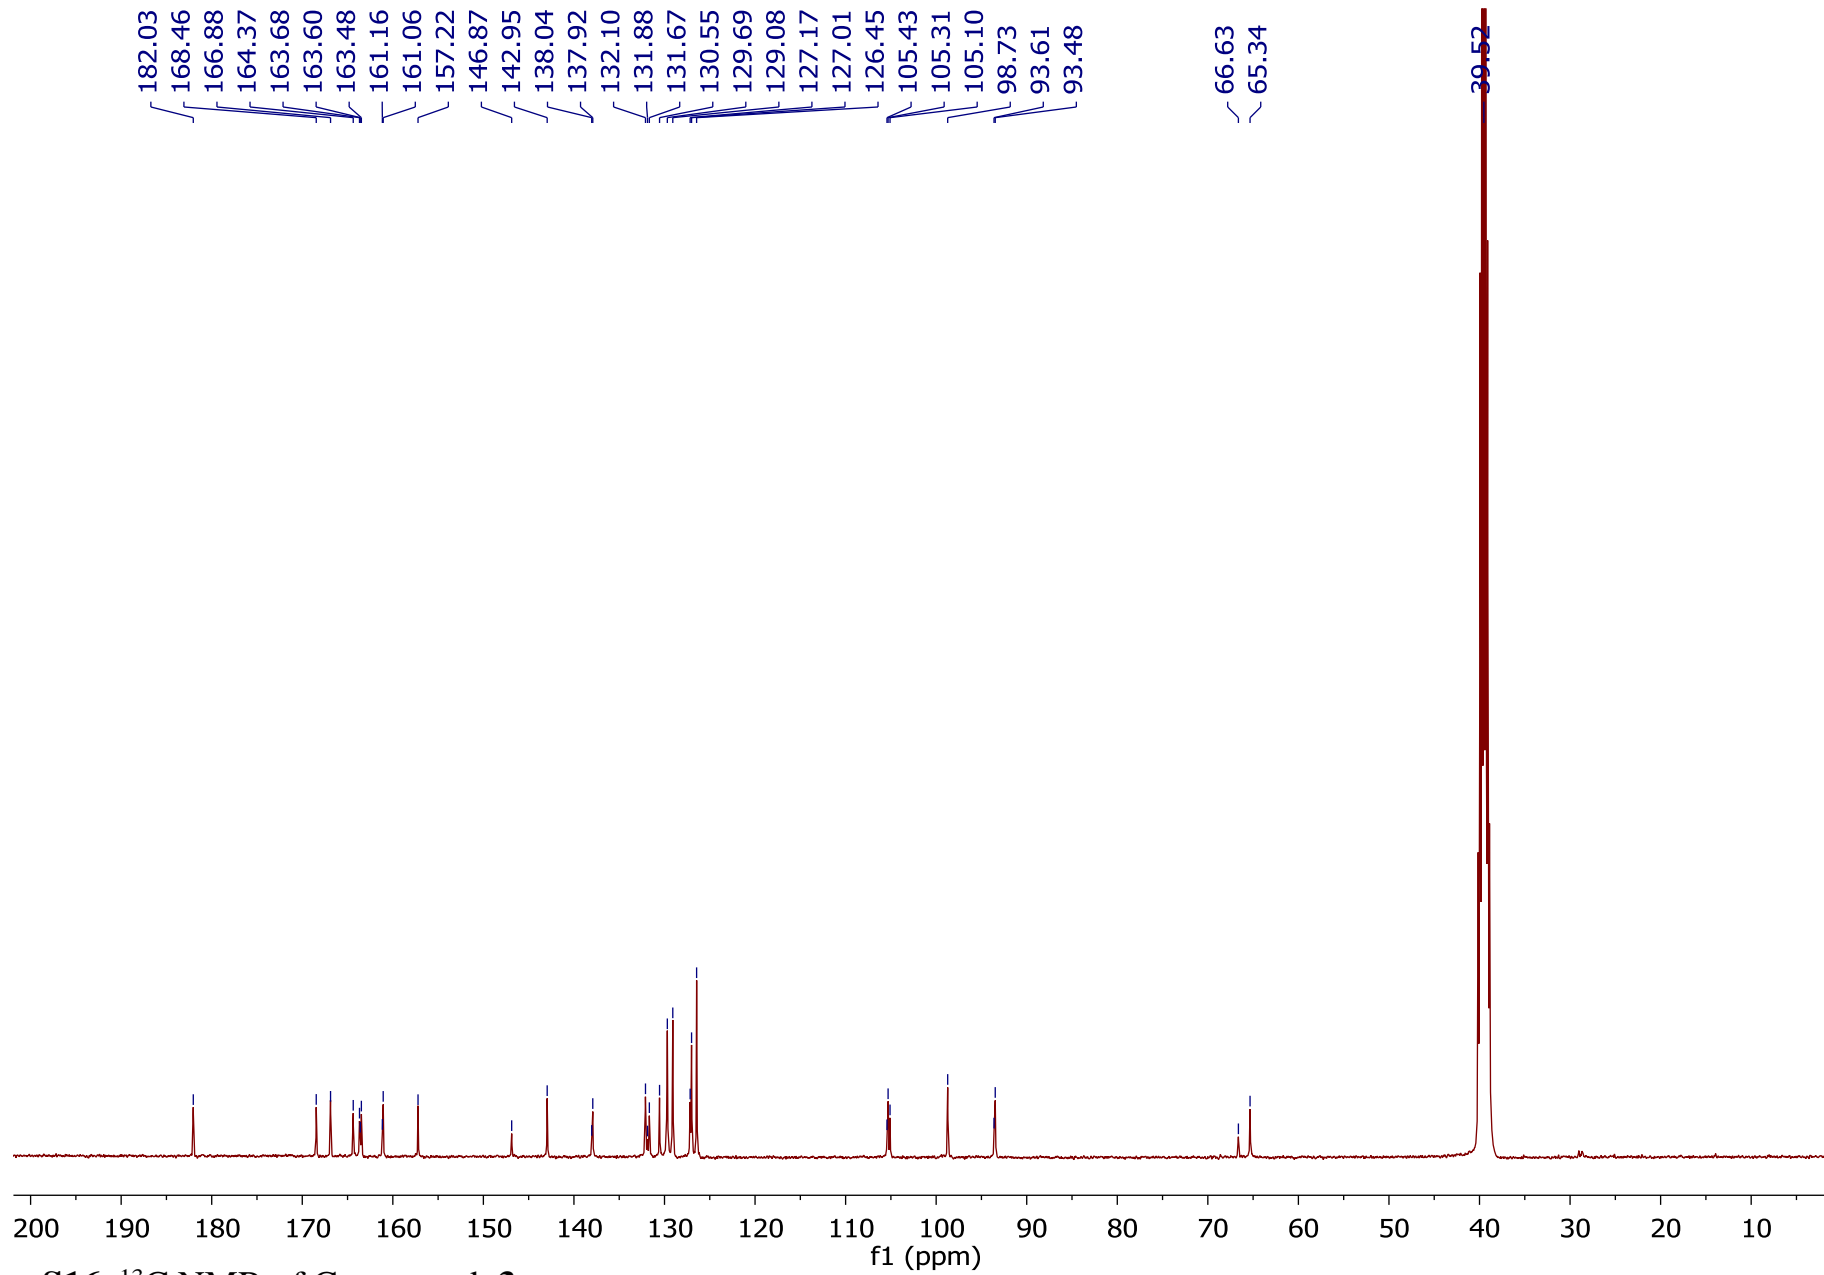

**S16.** <sup>13</sup>C NMR of Compound **3g**



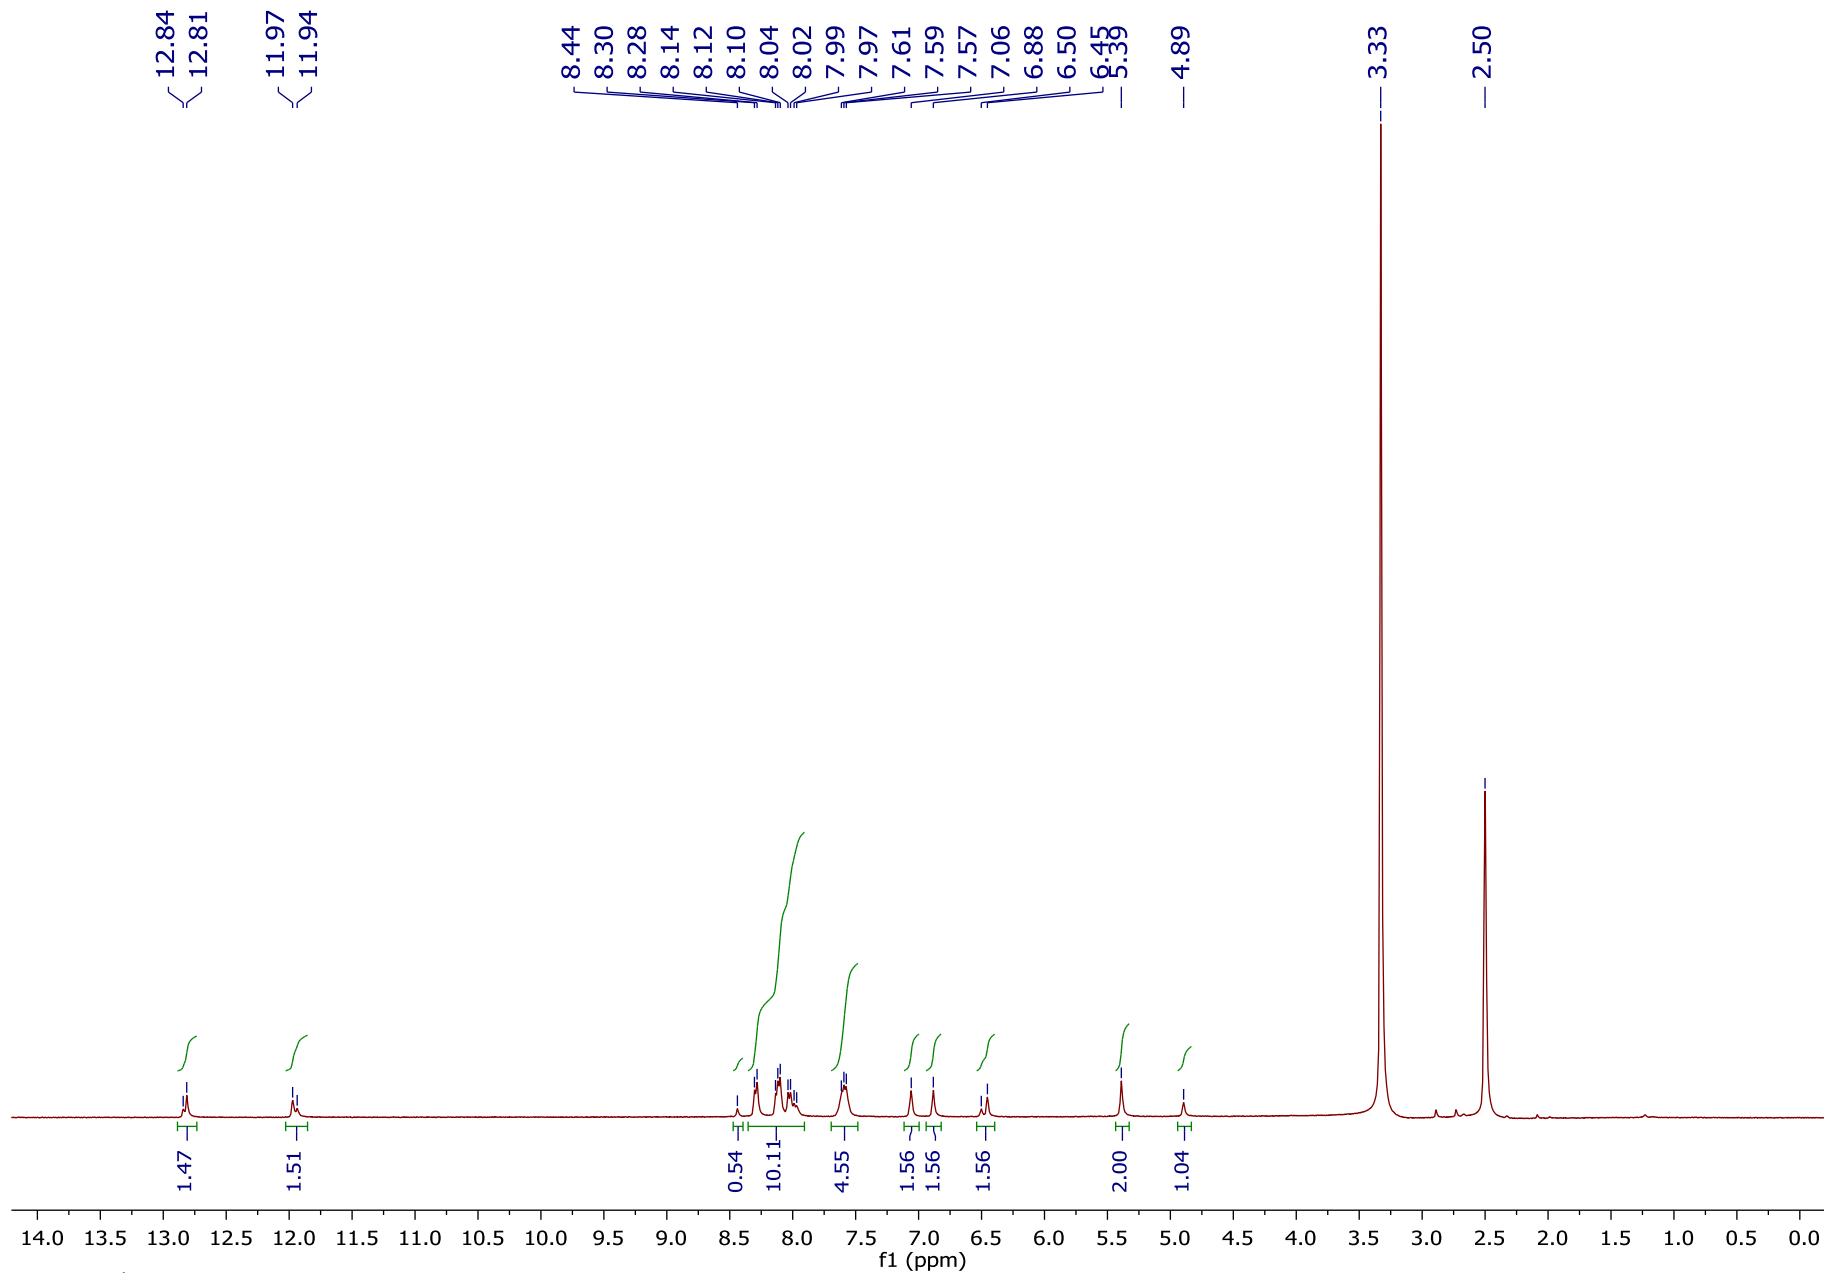

S17. <sup>1</sup>H NMR of Compound 3h

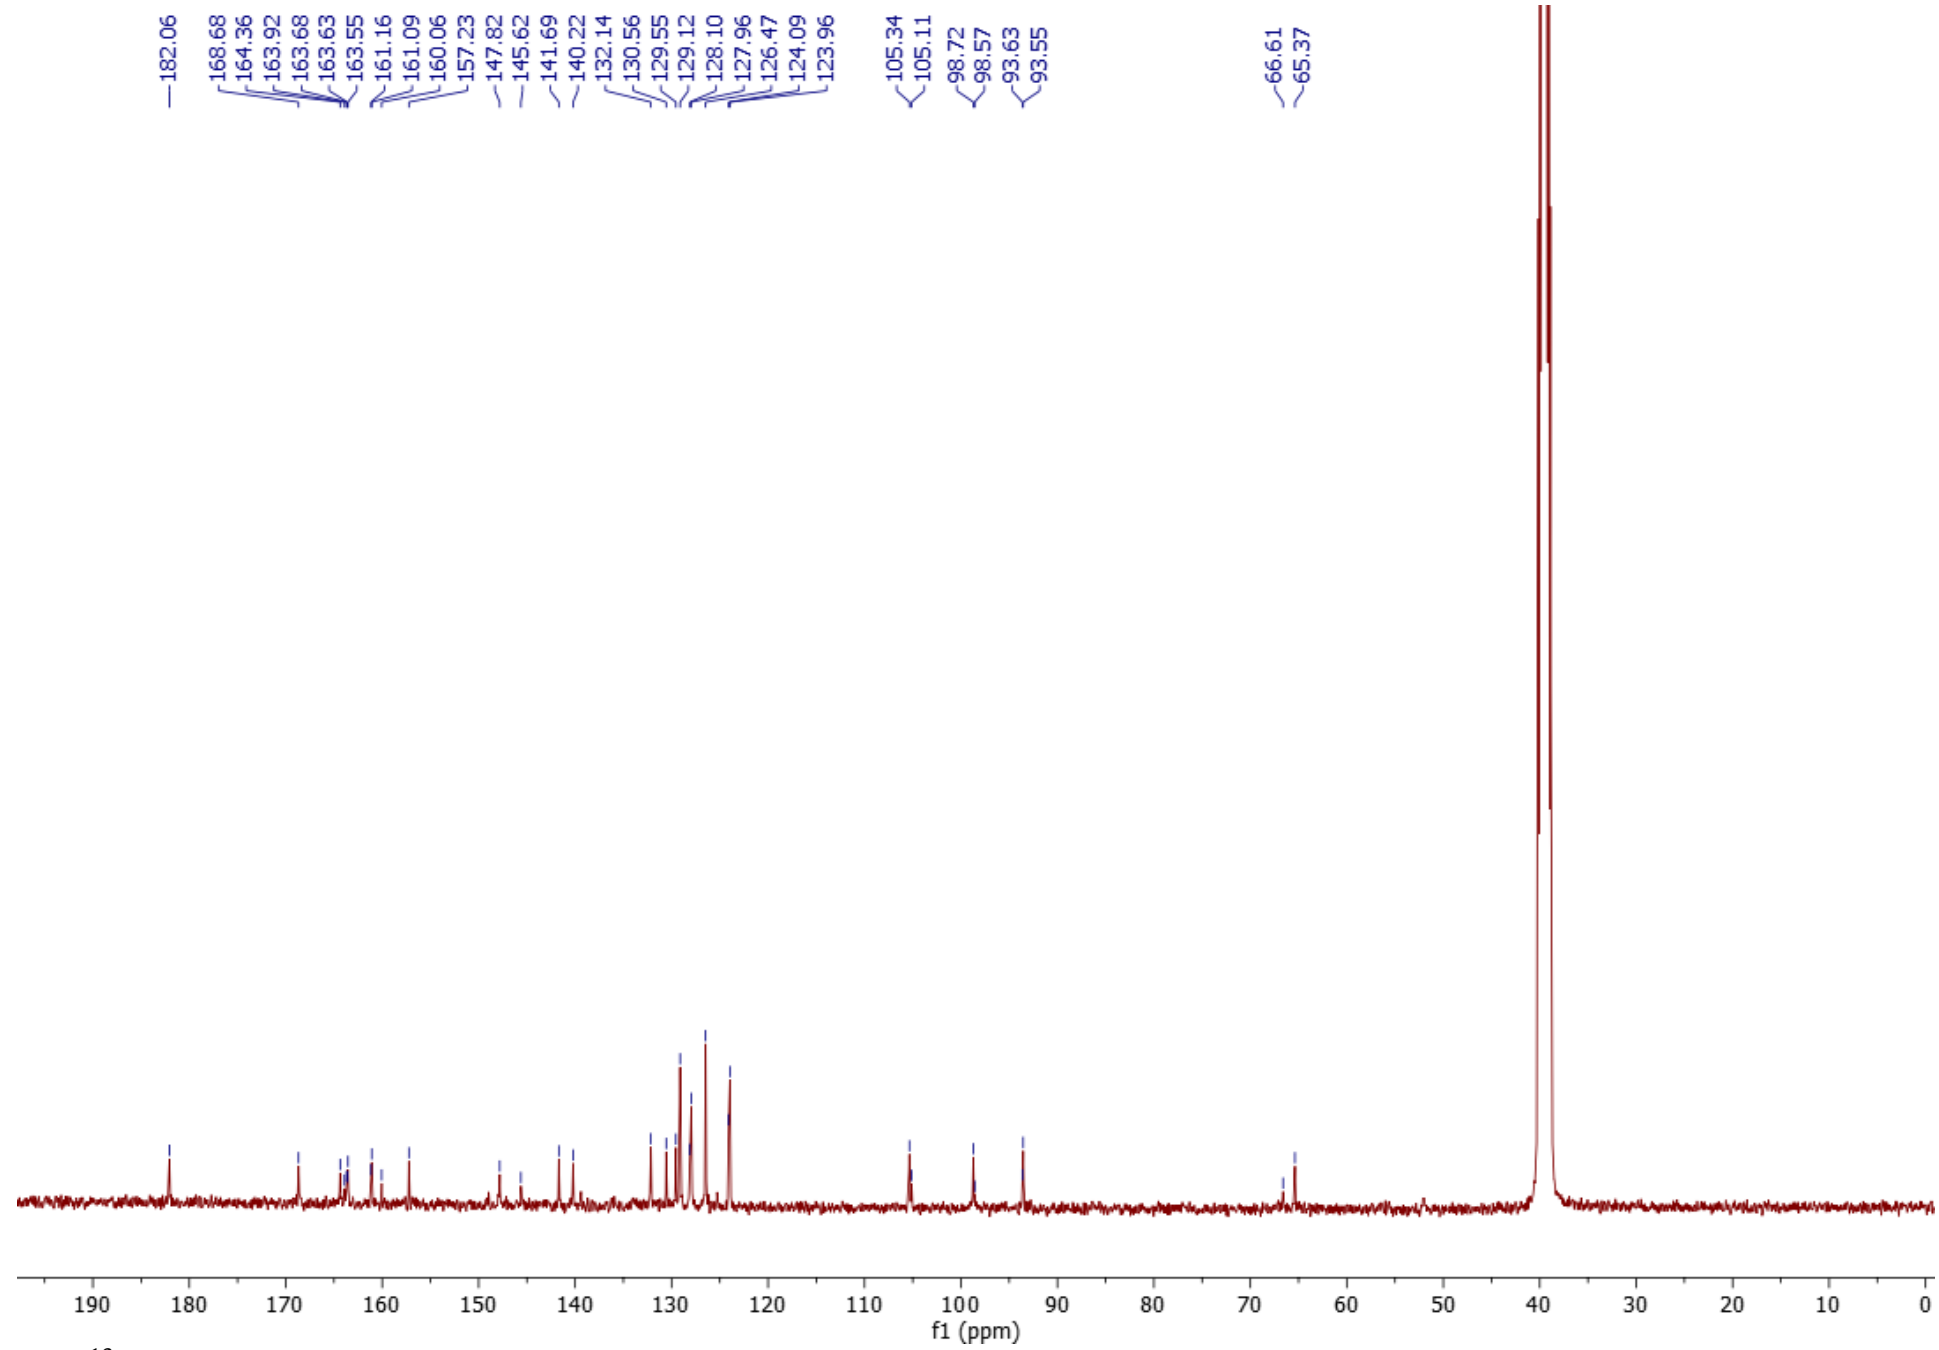

**S18.**  $^{13}\text{C}$  NMR of Compound **3h**

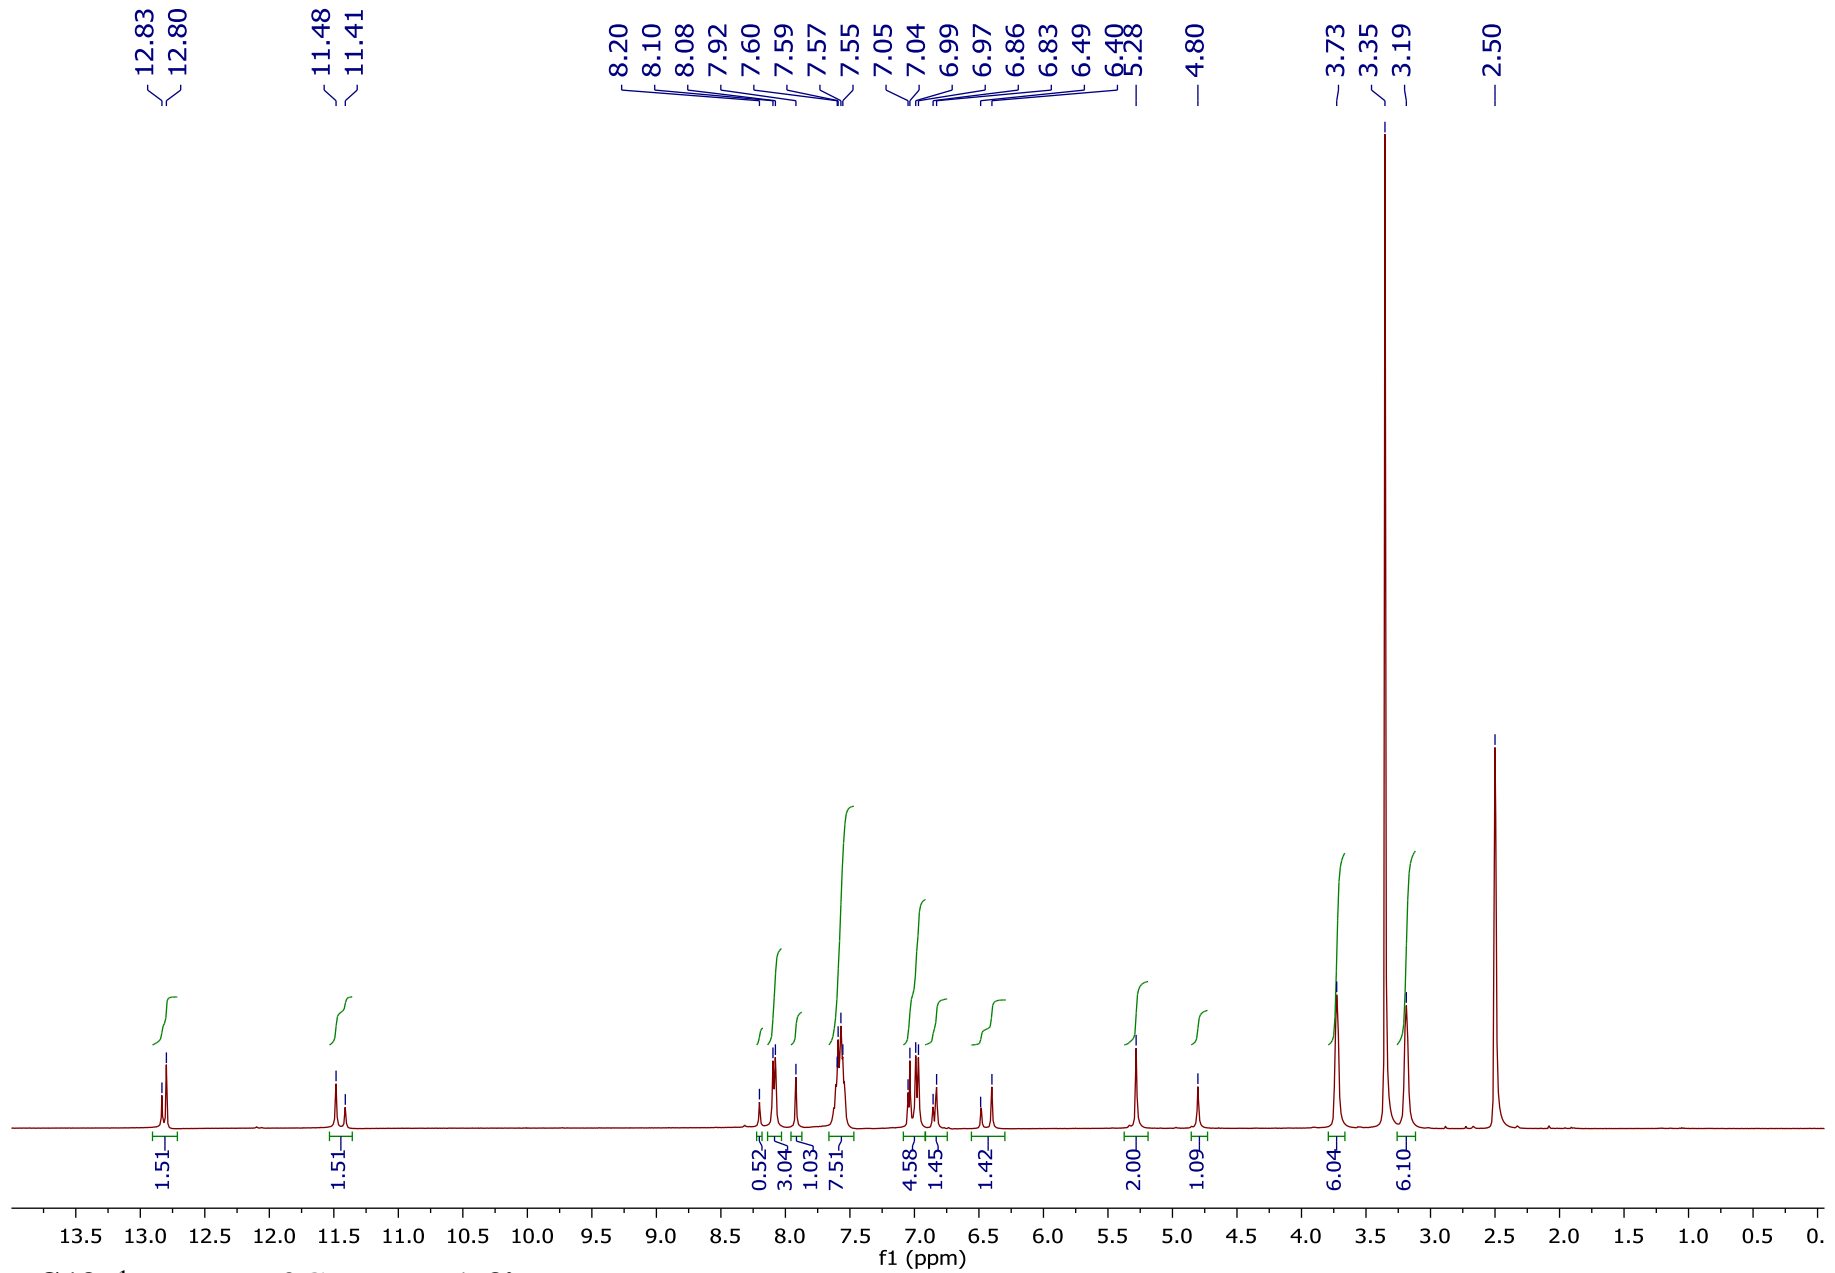

**S19.** <sup>1</sup>H NMR of Compound **3i**

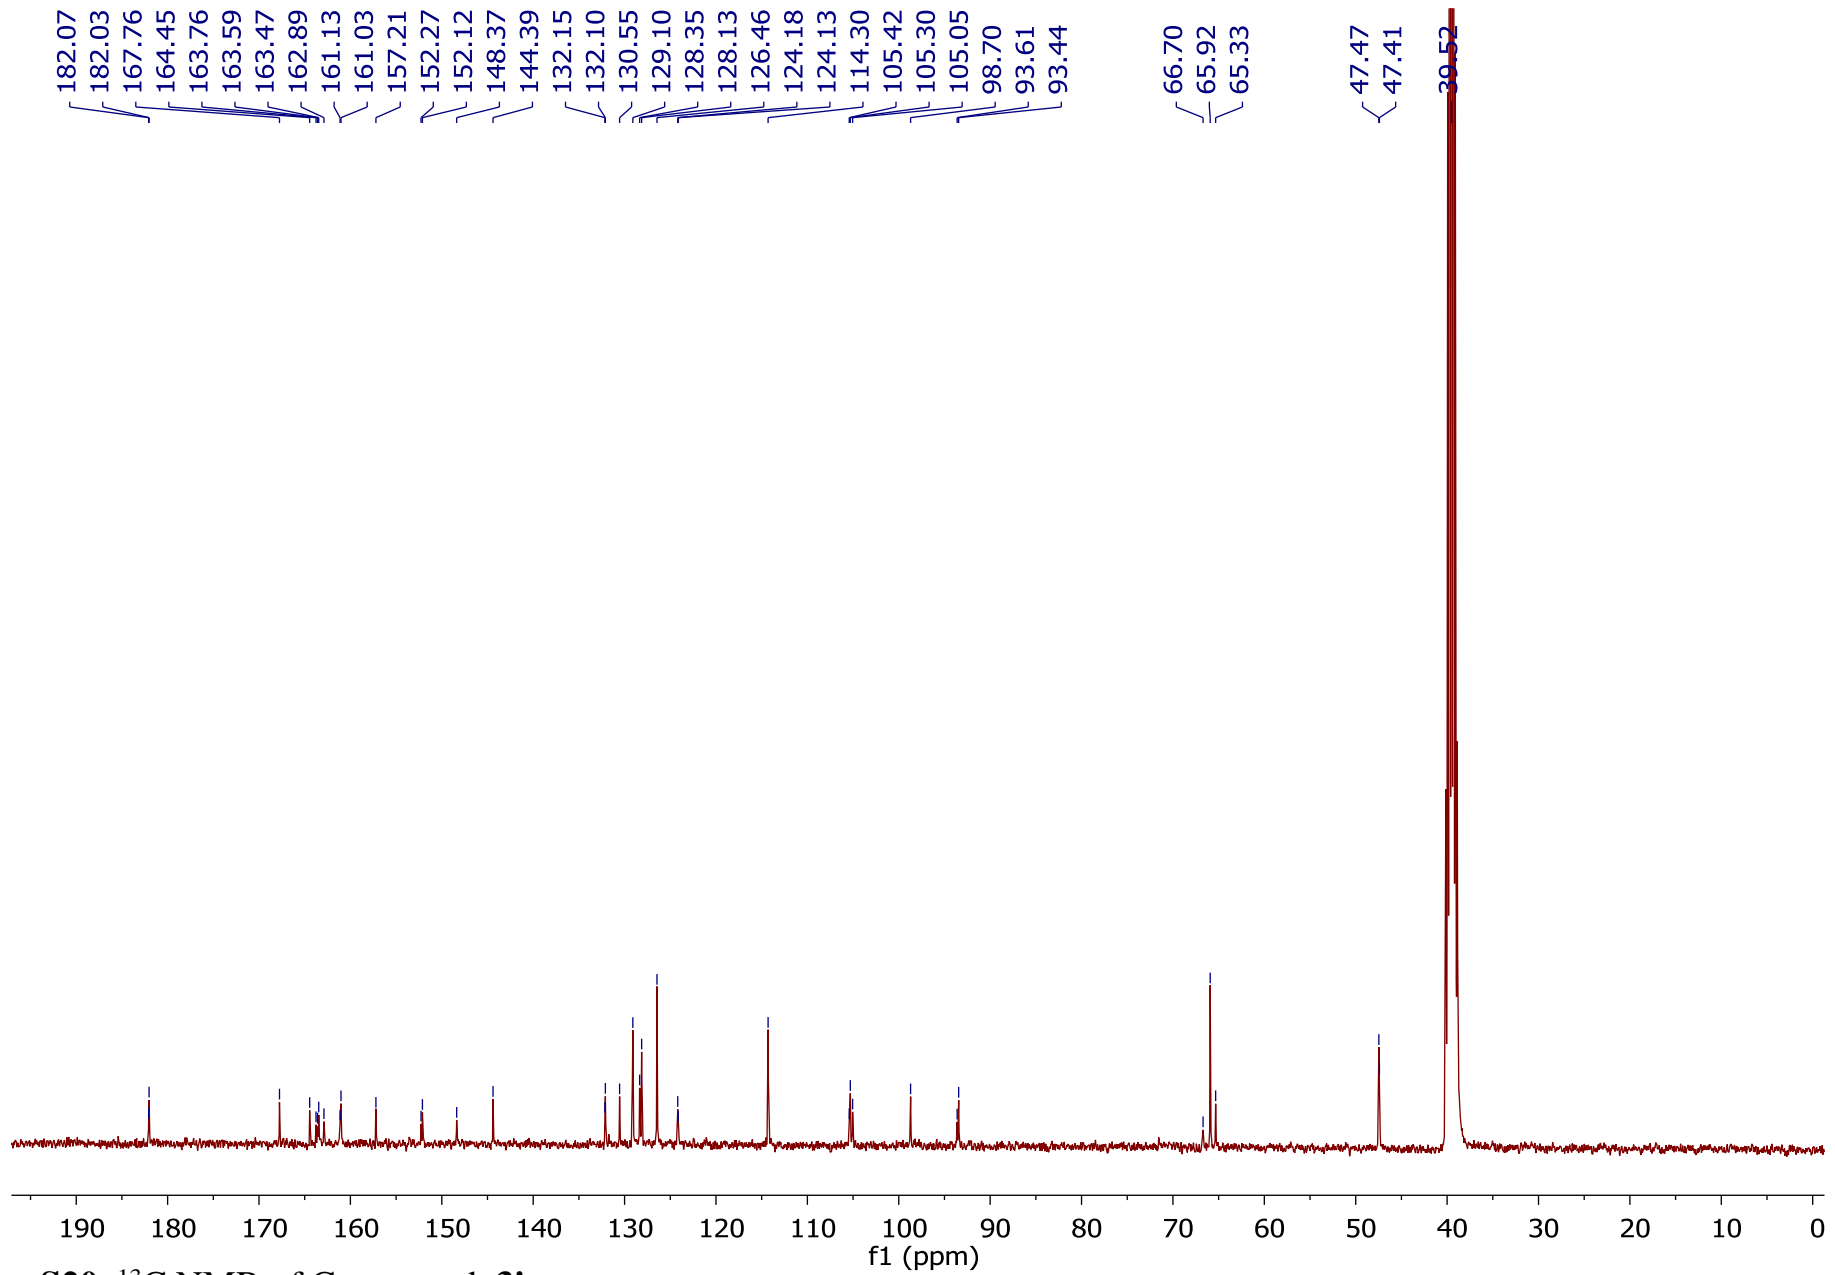

S20.  $^{13}\text{C}$  NMR of Compound **3i**

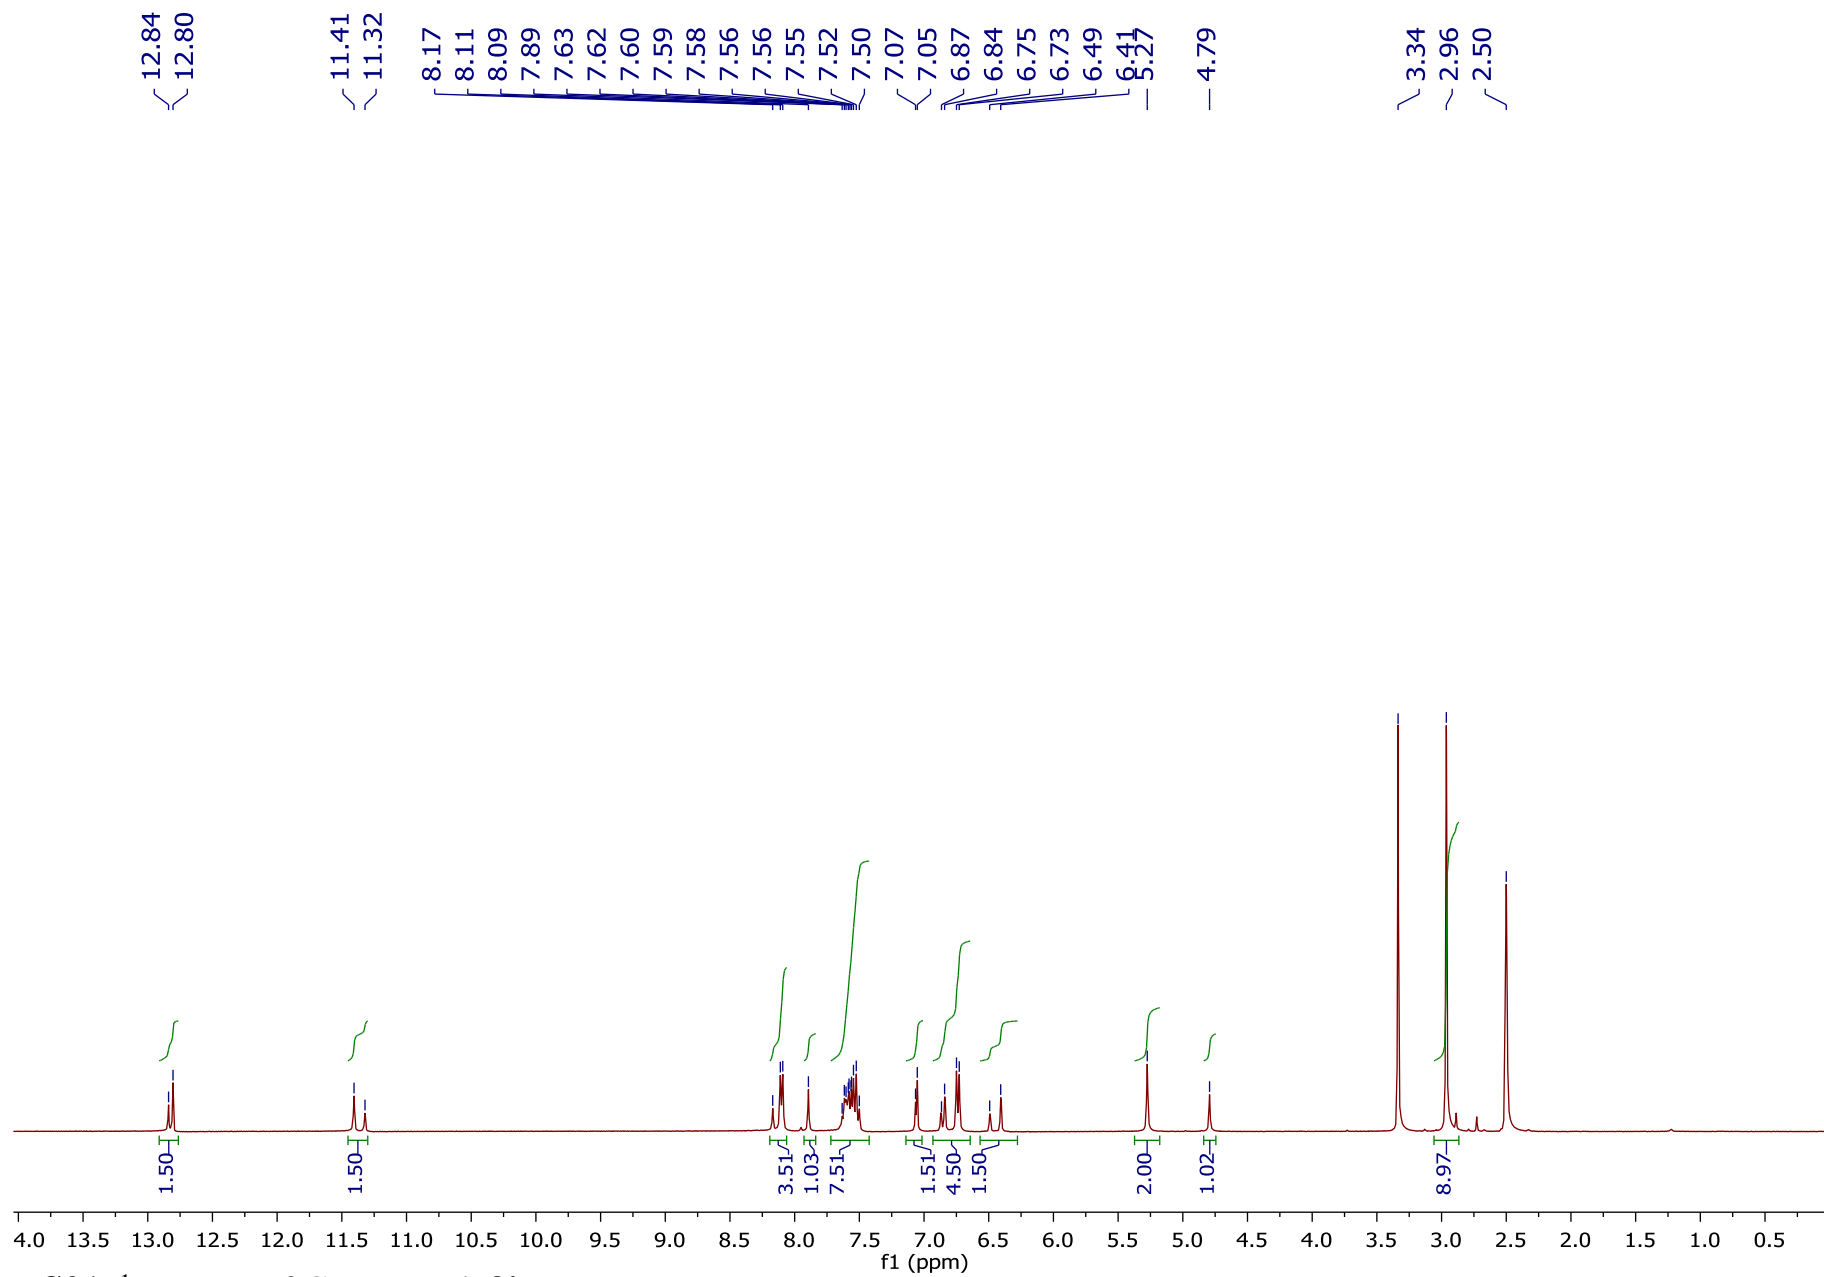

S21. <sup>1</sup>H NMR of Compound 3j

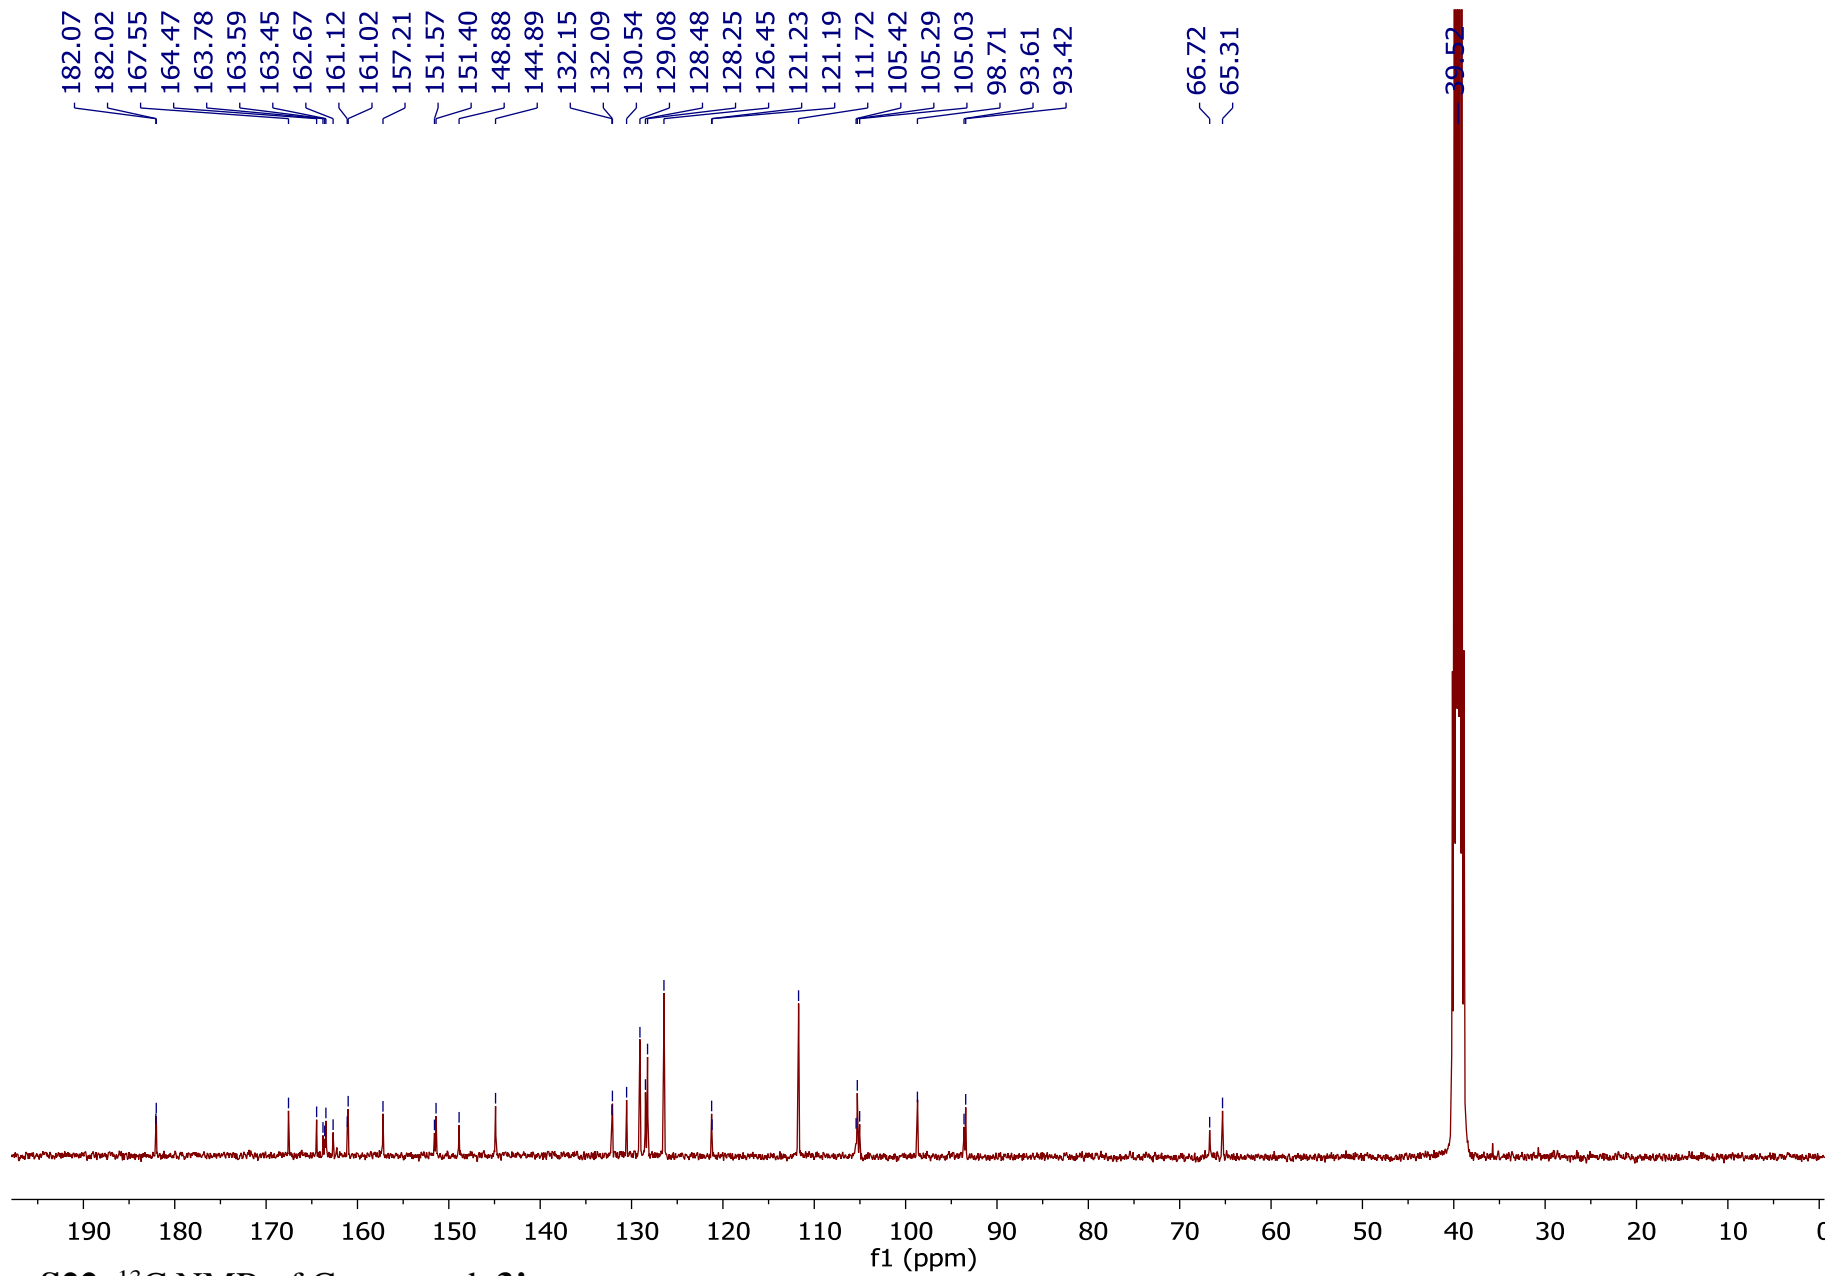

S22.  $^{13}\text{C}$  NMR of Compound 3j

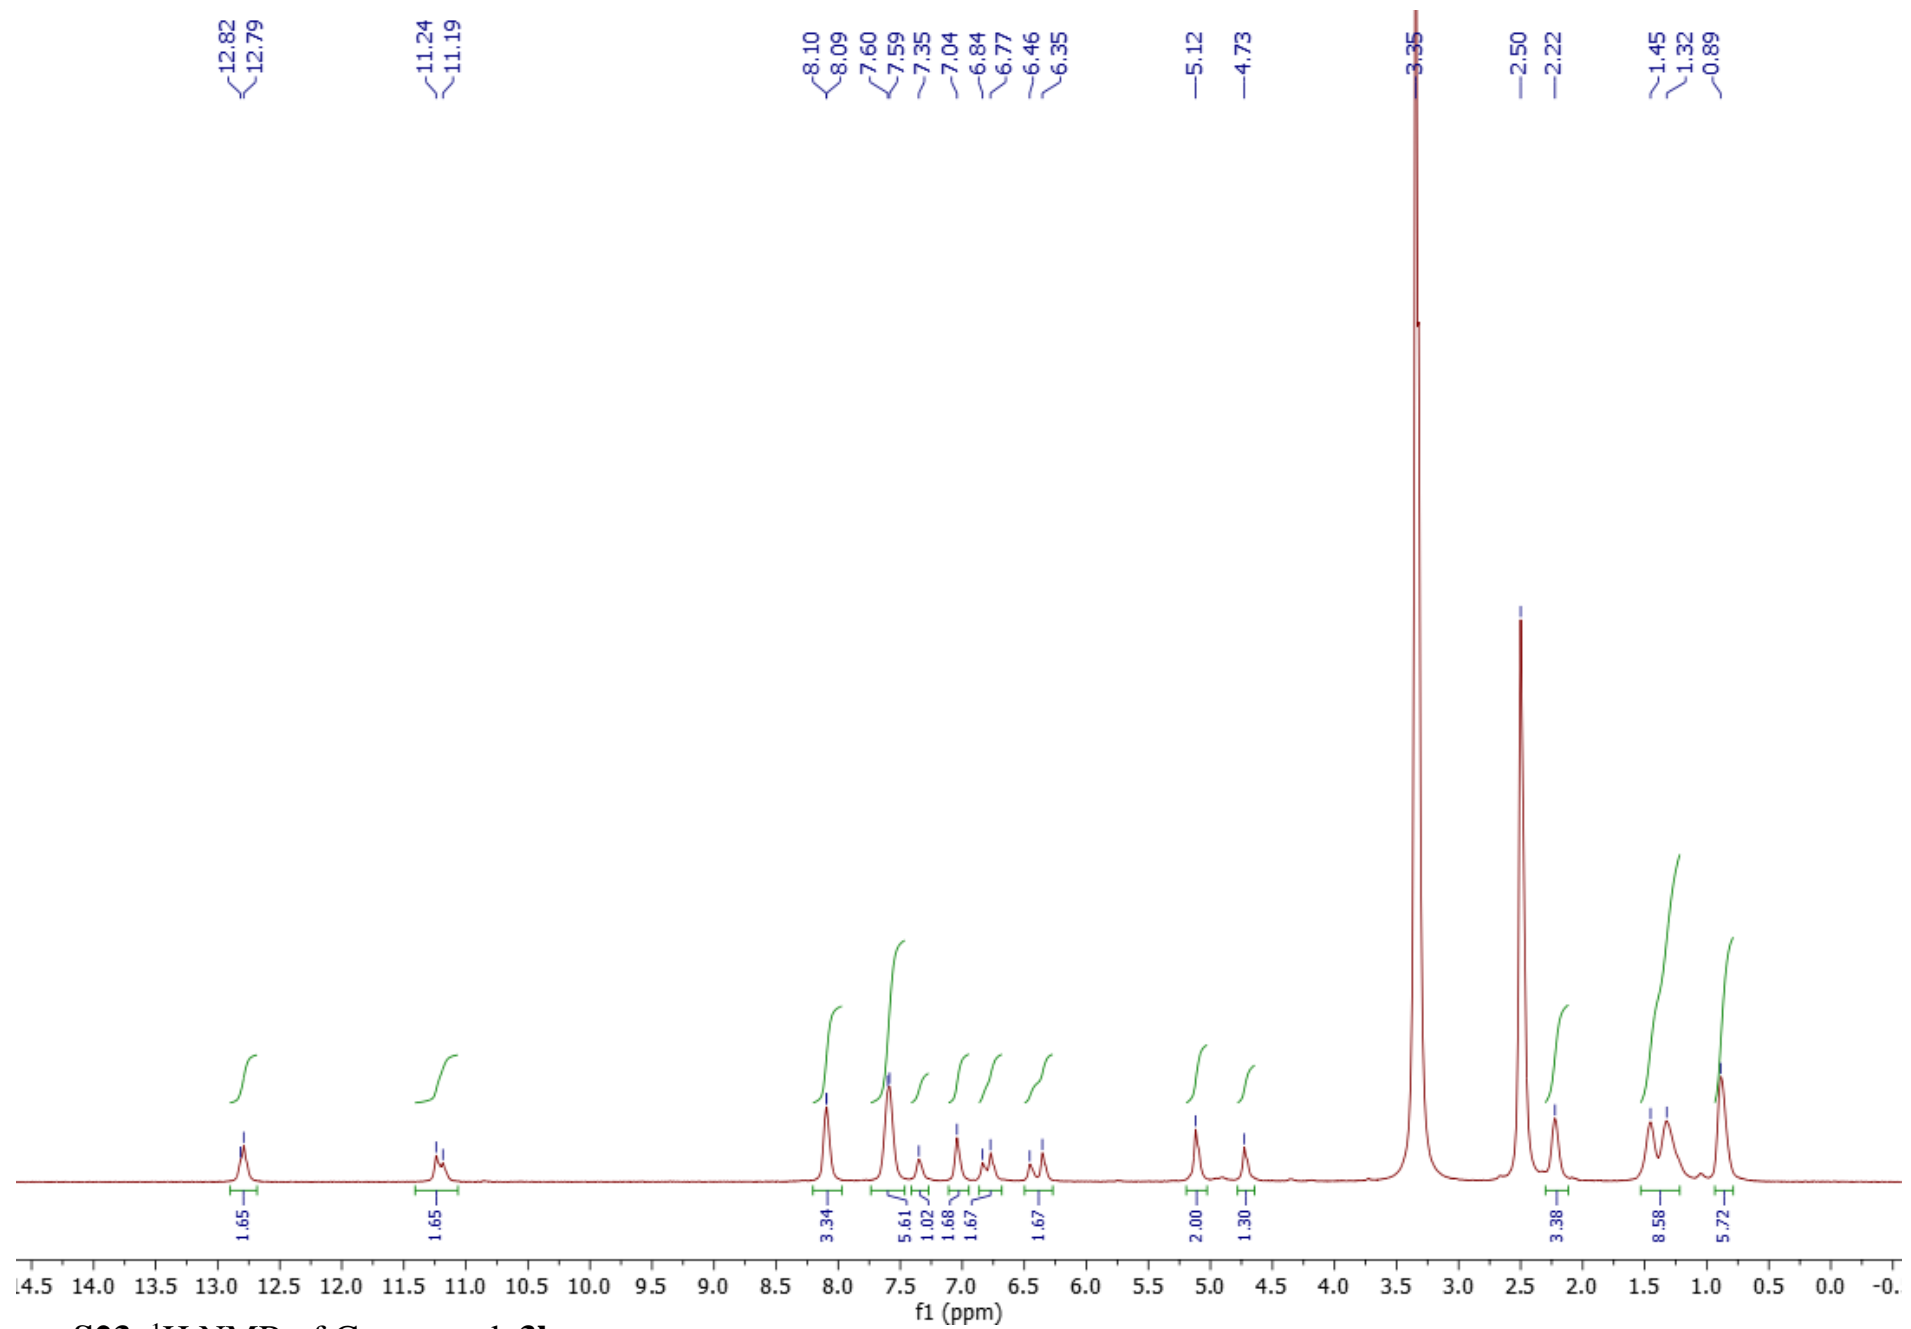

S23. <sup>1</sup>H NMR of Compound 3k

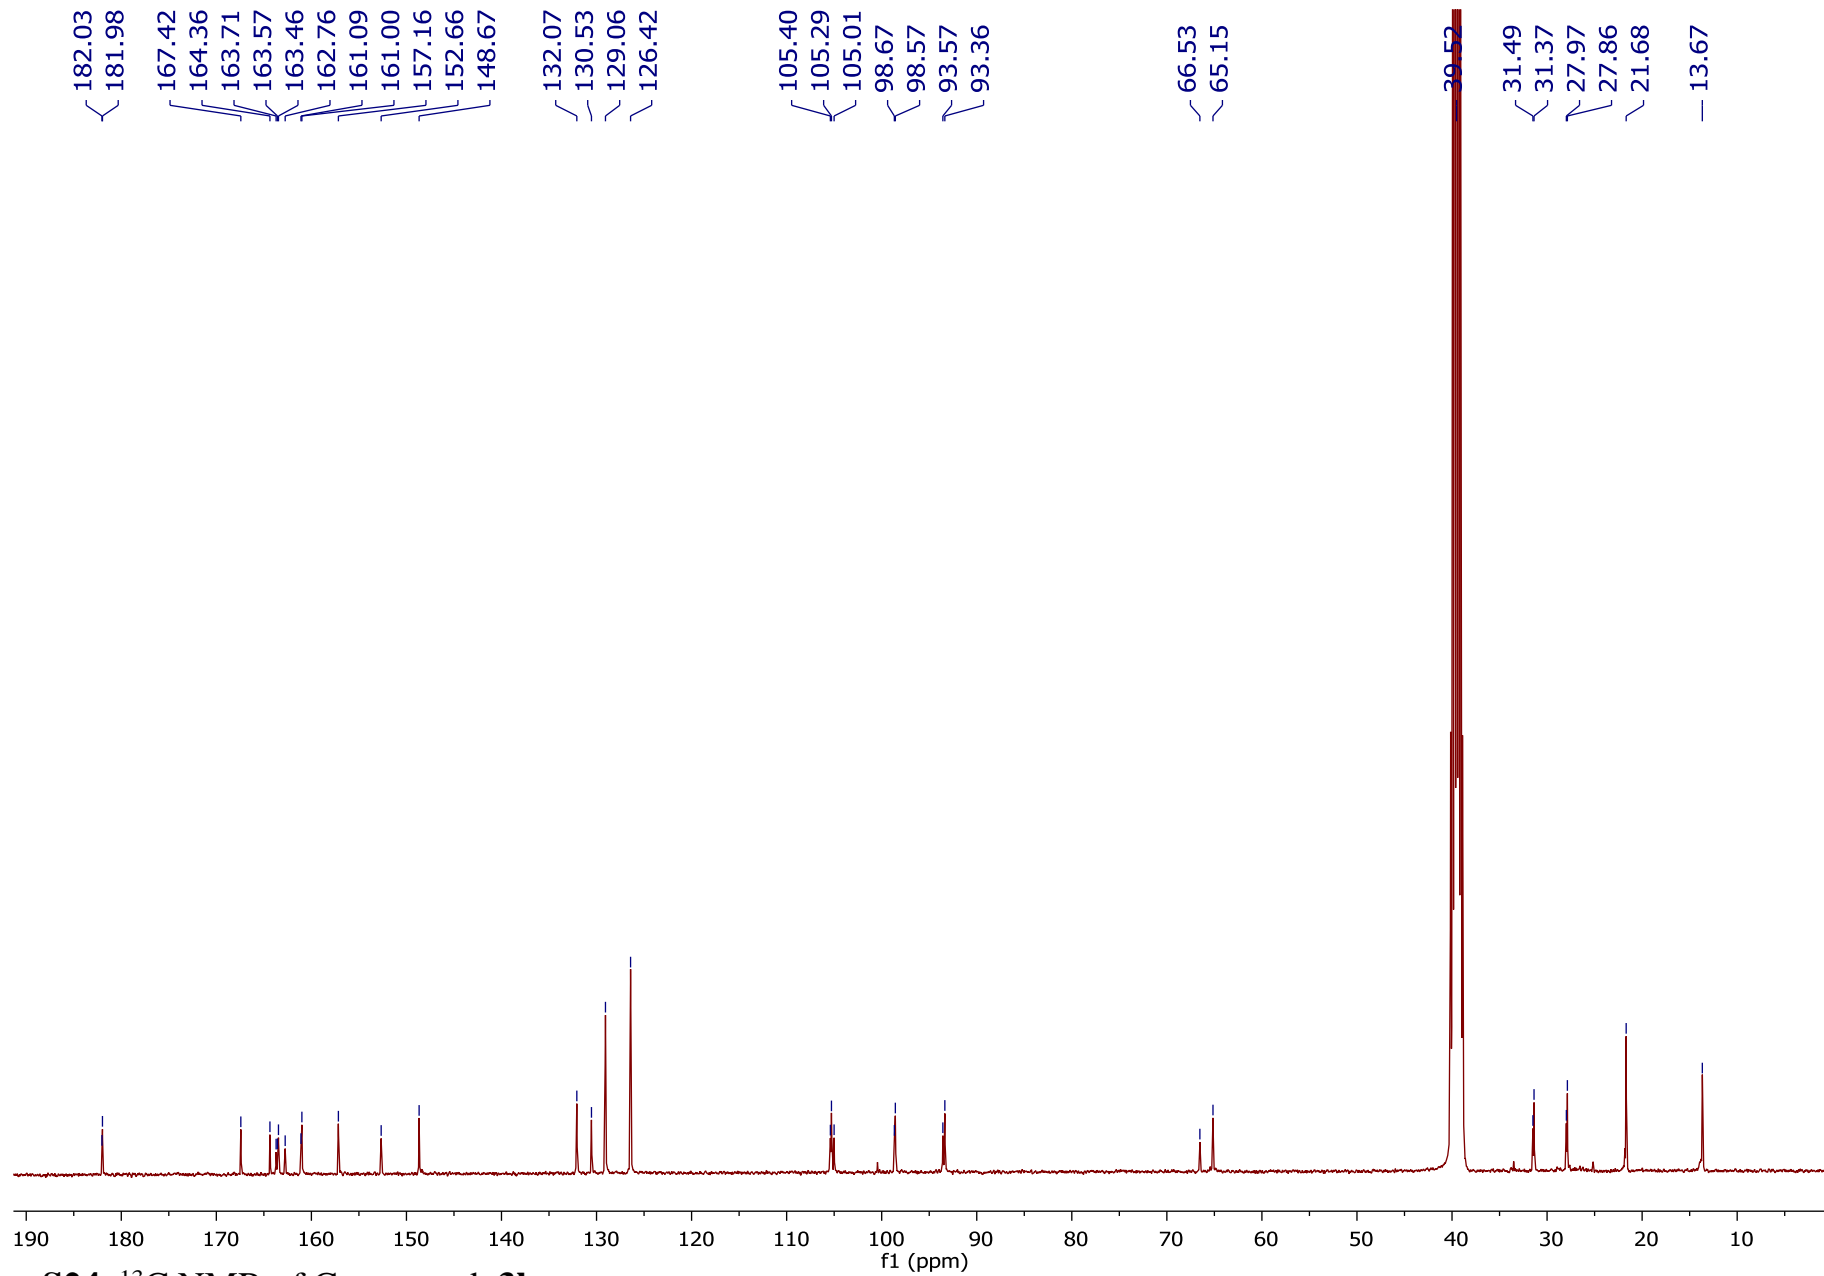

S24.  $^{13}\text{C}$  NMR of Compound 3k



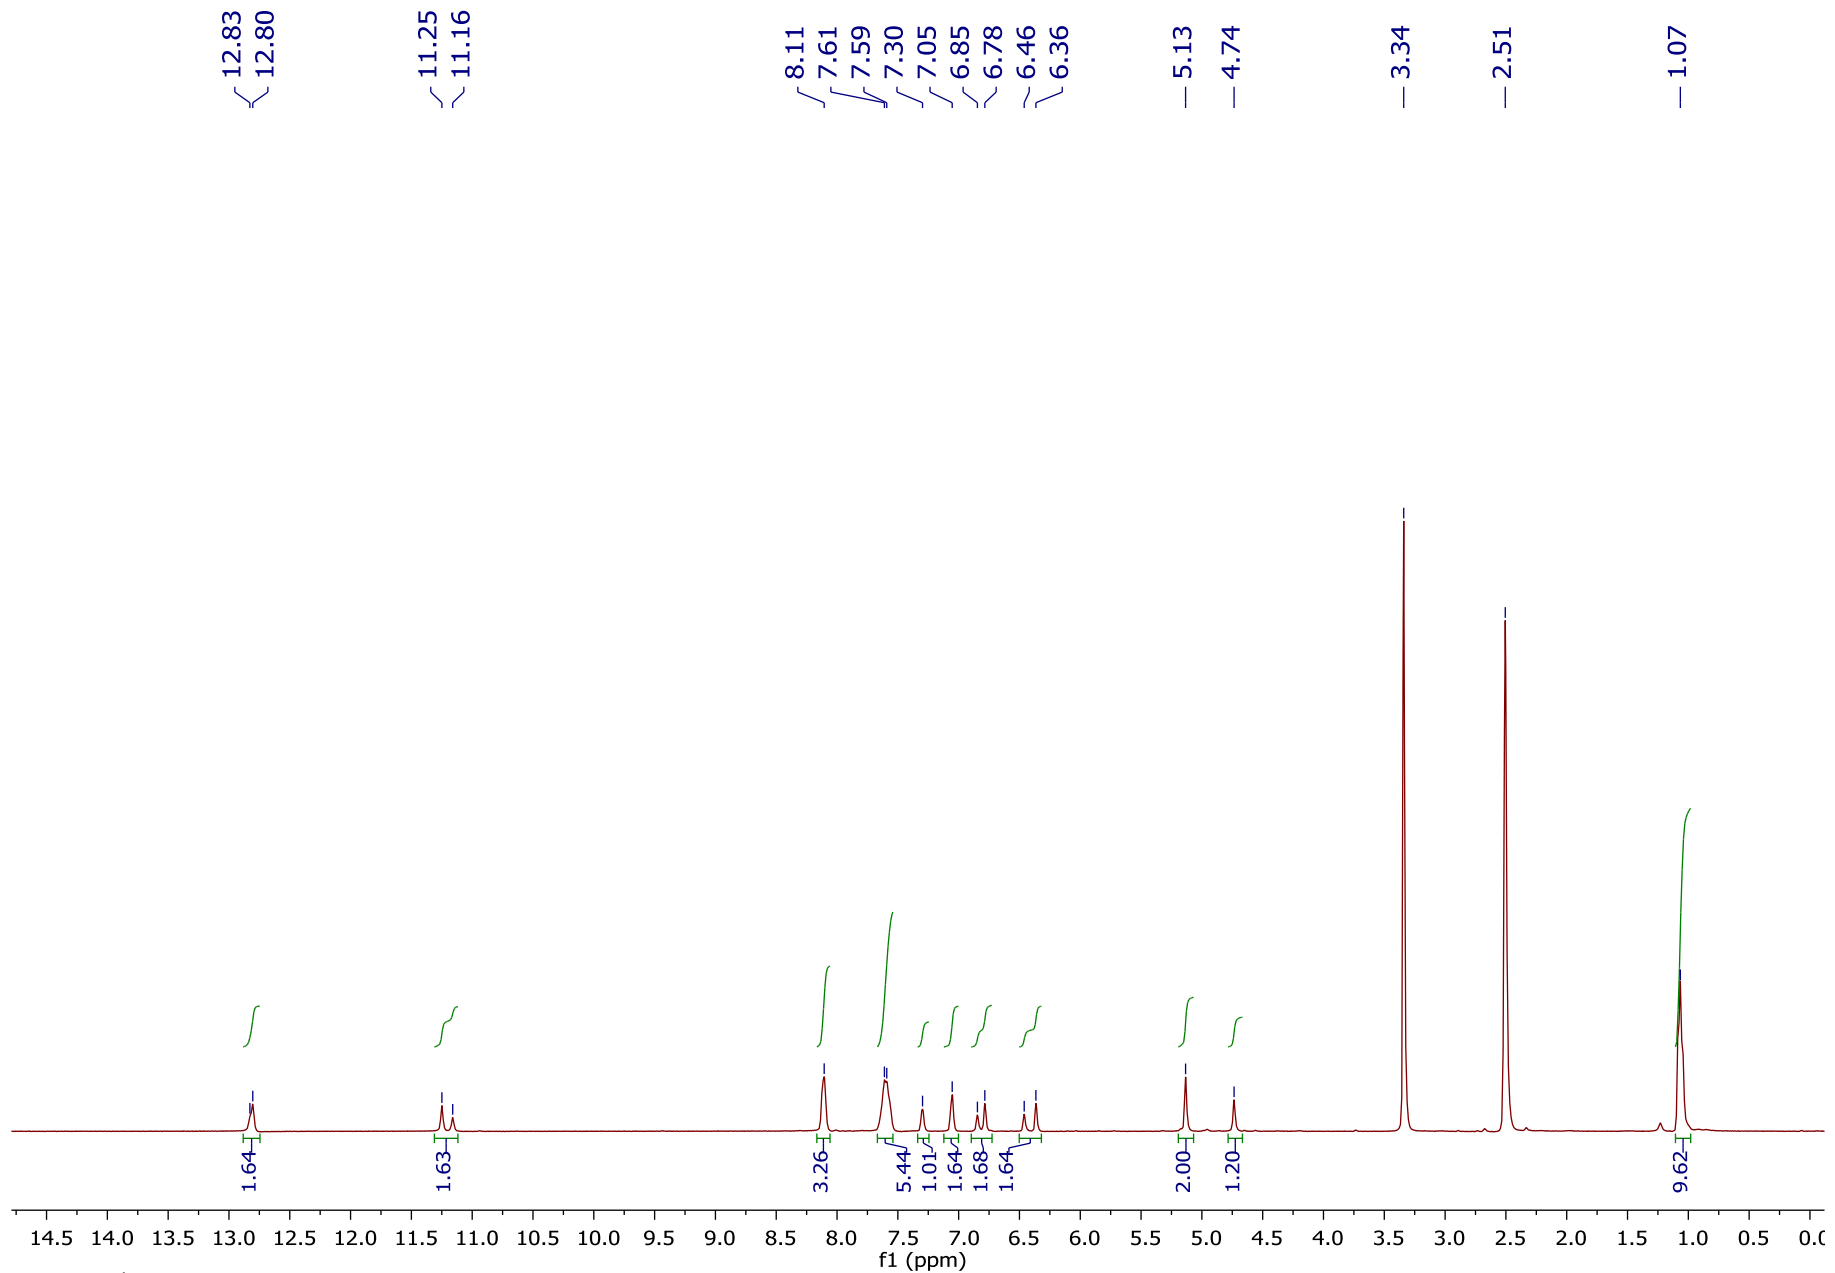

S25. <sup>1</sup>H NMR of Compound 3l

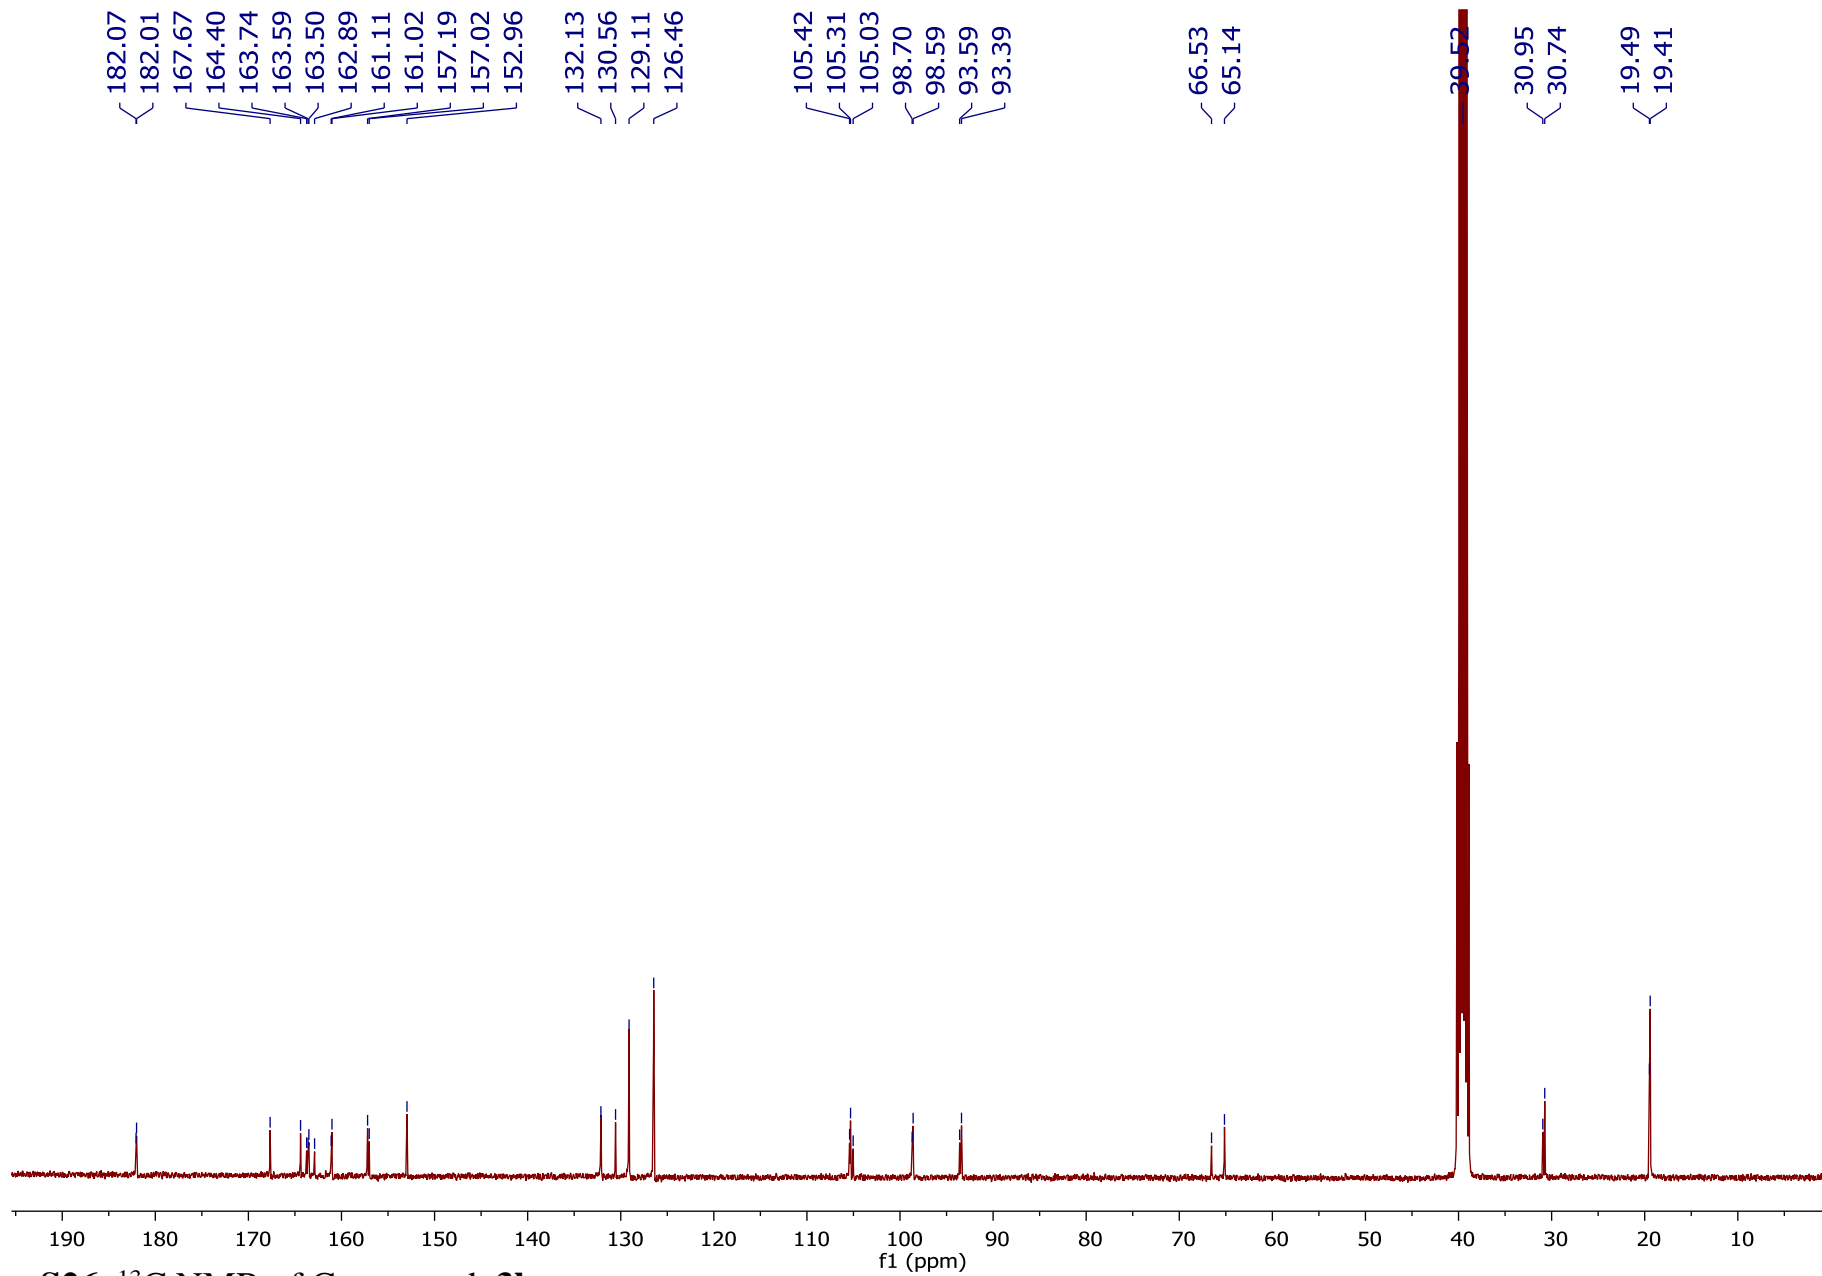

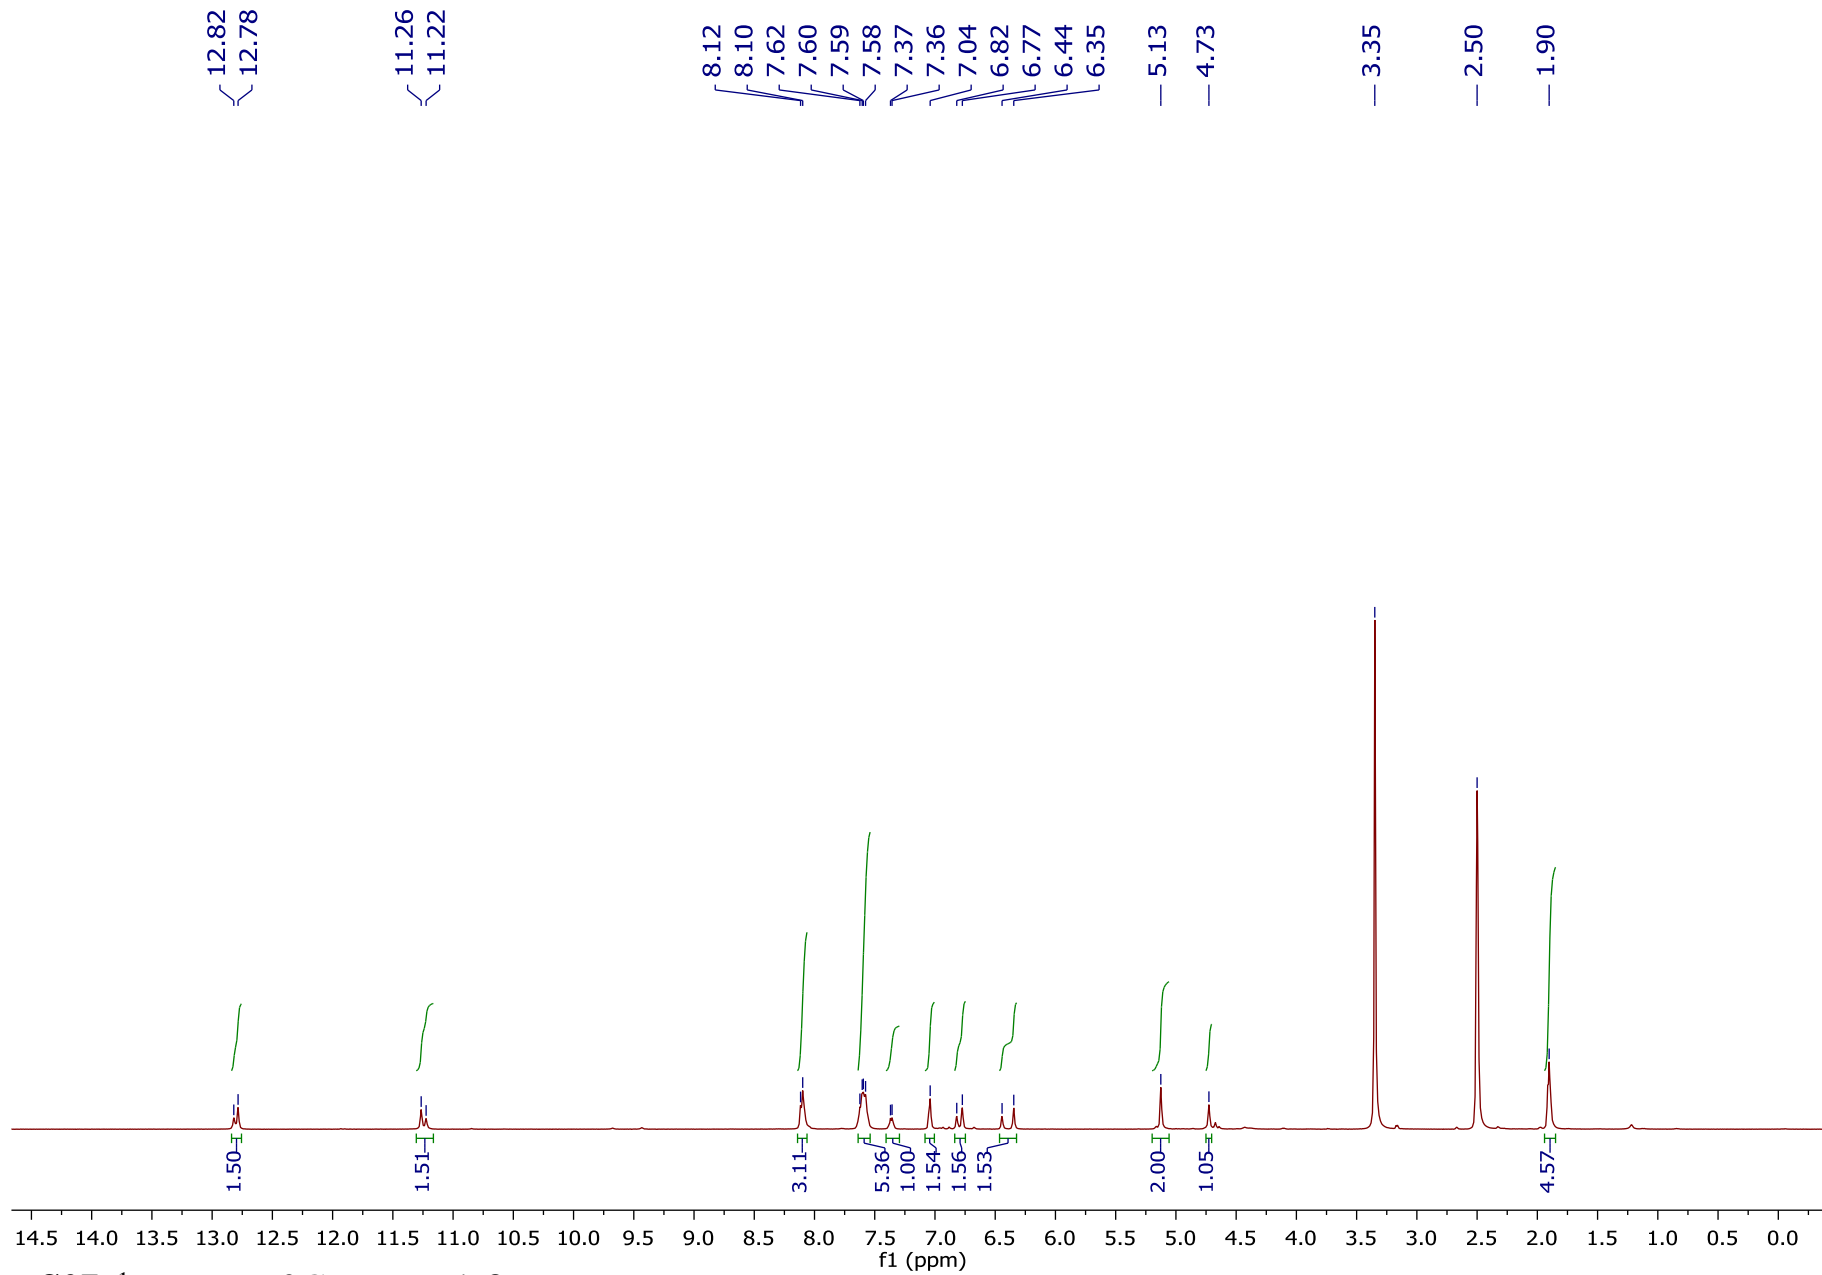

S27. <sup>1</sup>H NMR of Compound 3m

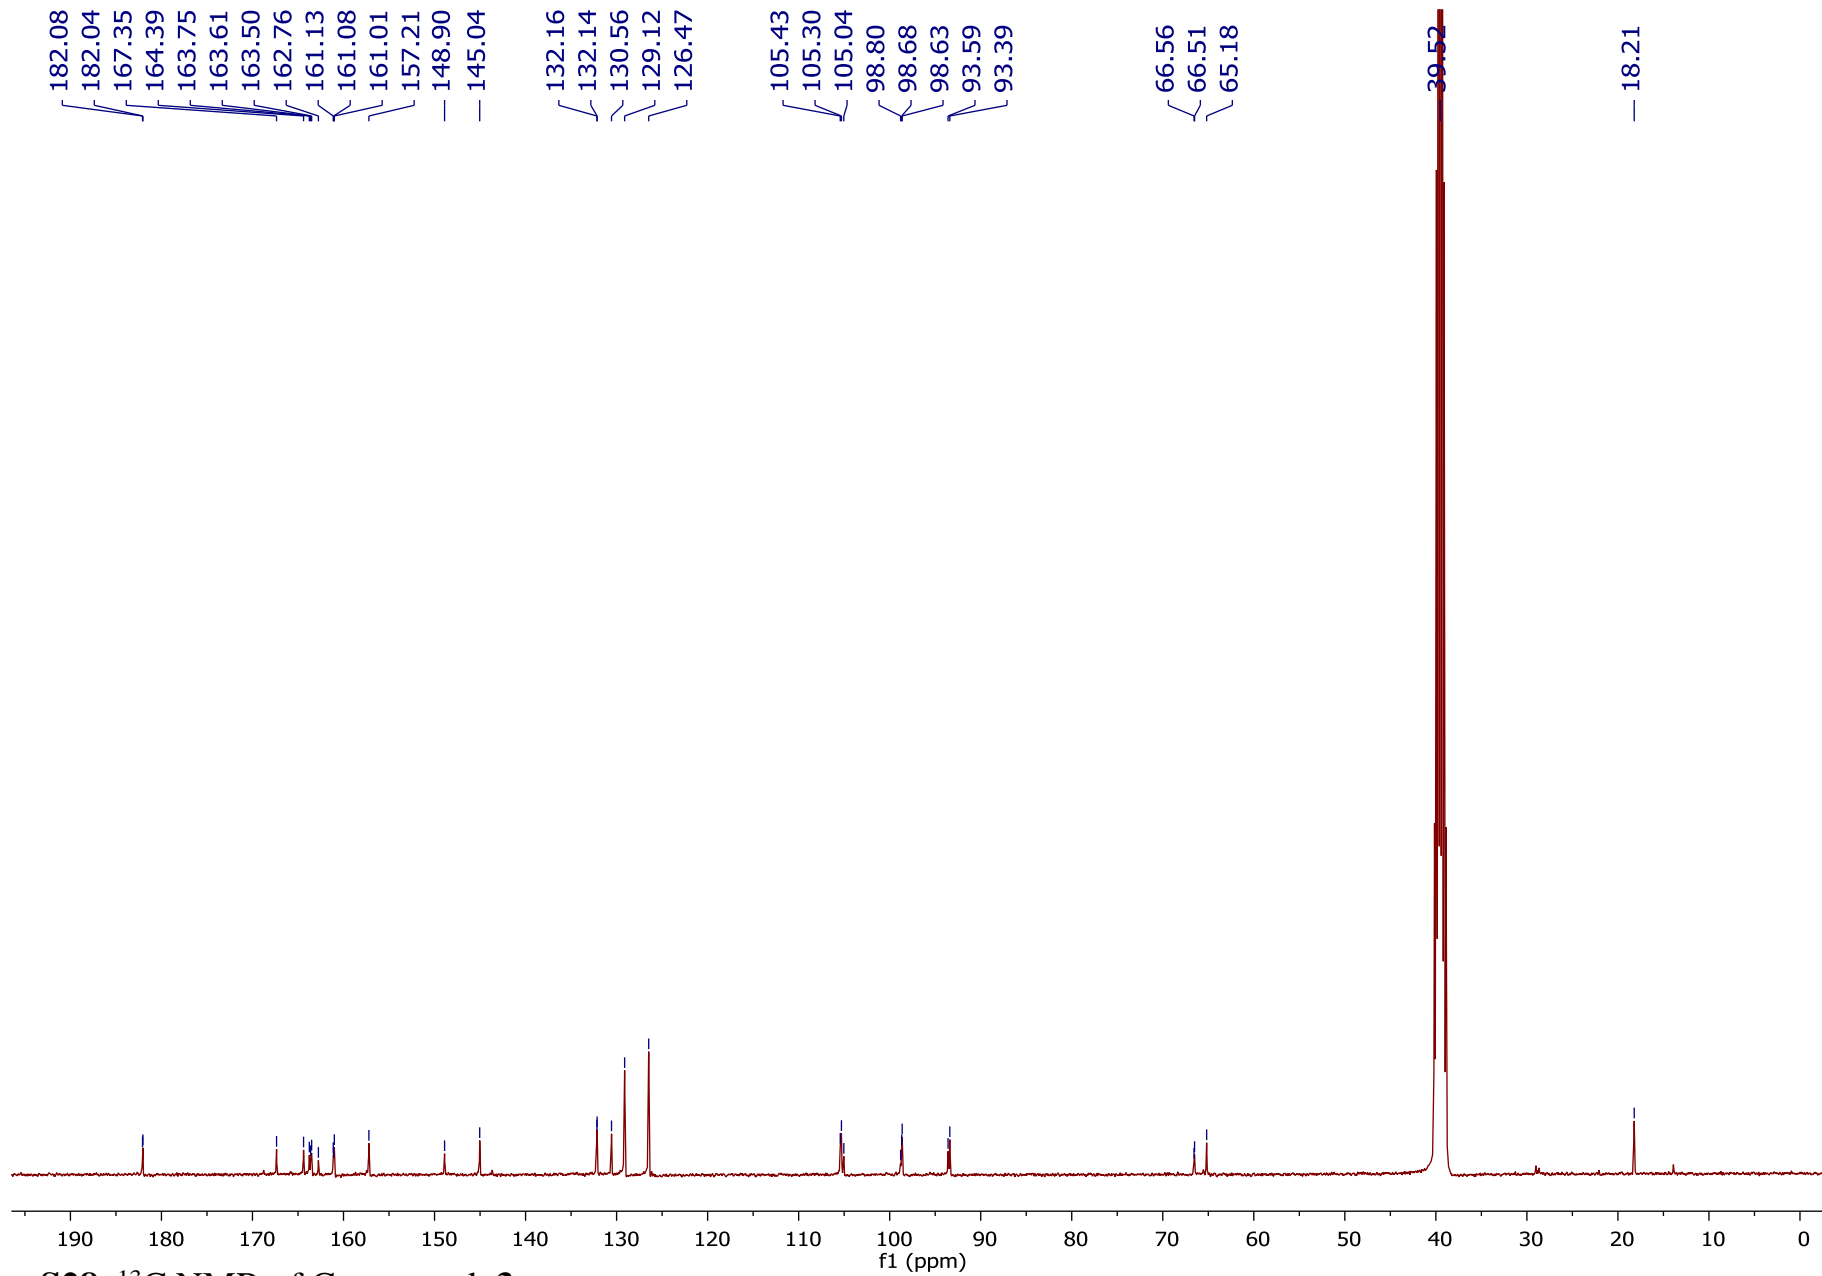

S28. <sup>13</sup>C NMR of Compound 3m
